# Supplementary material for: The role of substituted pyridine Schiff bases as ancillary ligands in the optical properties of a new series of fac-rhenium(i) tricarbonyl complexes: a theoretical view
Source: Royal Society of Chemistry journal article supplement (doi:10.1039/d1ra05737e), 2021-01-01
Supplement: d1ra05737e1.pdf [file d1ra05737e1.pdf]

### **Supplementary Material**

#### **The role of the substituted pyridine Schiff bases as ancillary ligands in the optical properties of a new series of *fac*-rhenium(III) tricarbonyl complexes: A theoretical view**

Rosaly Morales-Guevara,<sup>1,2</sup> Juan A. Fuentes,<sup>3</sup> Dayán Paez-Hernández,<sup>1,2\*</sup> Alexander Carreño<sup>1,2\*</sup>

<sup>1</sup>Universidad Andres Bello, Programa de Doctorado en Físicoquímica Molecular, Facultad de Ciencias Exactas, Santiago, Chile.

<sup>2</sup>Center of Applied Nano Sciences (CANS), Facultad de Ciencias Exactas, Universidad Andres Bello, República 330, Santiago, Chile.

<sup>3</sup>Laboratorio de Genética y Patogénesis Bacteriana, Facultad de Ciencias de la Vida, Universidad Andrés Bello, República 330, Santiago, Chile.

\*Corresponding authors: [alexander.carreno@unab.cl](mailto:alexander.carreno@unab.cl); [d.paez@unab.cl](mailto:d.paez@unab.cl)

## Section 1: Supplementary Tables

**Table S1.** Re(I) tricarbonyl complexes and Schiff bases (**PSB**) analyzed in this study.

| Re(I) Complex | (N,N)    | Pyridine Schiff Base                                                   | Structure Pyridine Schiff Base                                                                           |
|---------------|----------|------------------------------------------------------------------------|----------------------------------------------------------------------------------------------------------|
| <b>R1</b>     | 2,2'-bpy | ( <i>E</i> )-2-(((4-aminopyridin-3-yl)imino)methyl)-4,6-dimethylphenol | <p><b>PSB1</b></p> 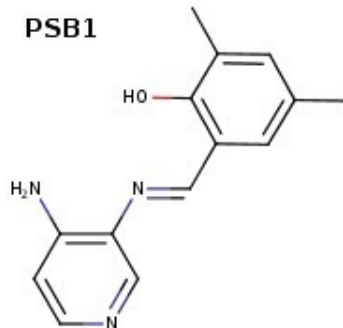   |
| <b>R2</b>     | 2,2'-bpy | ( <i>E</i> )-2-(((4-aminopyridin-3-yl)imino)methyl)-4-methylphenol     | <p><b>PSB2</b></p>   |
| <b>R3</b>     | 2,2'-bpy | ( <i>E</i> )-2-(((4-aminopyridin-3-yl)imino)methyl)-4,6-difluorophenol | <p><b>PSB3</b></p>  |
| <b>R4</b>     | 2,2'-bpy | ( <i>E</i> )-2-(((4-aminopyridin-3-yl)imino)methyl)-4-fluorophenol     | <p><b>PSB4</b></p>  |

| Re(I)<br>Complex | (N,N)                                     | Pyridine Schiff<br>Base                                                        | Structure Pyridine<br>Schiff Base |
|------------------|-------------------------------------------|--------------------------------------------------------------------------------|-----------------------------------|
| <b>R5</b>        | 4,4'-<br>bis(ethoxycarbonyl)-<br>2,2'-bpy | (E)-2-(((4-<br>aminopyridin-3-<br>yl)imino)methyl)-<br>4,6-di-<br>methylphenol |                                   |
| <b>R6</b>        | 4,4'-<br>bis(ethoxycarbonyl)-<br>2,2'-bpy | (E)-2-(((4-<br>aminopyridin-3-<br>yl)imino)methyl)-<br>4-methylphenol          |                                   |
| <b>R7</b>        | 4,4'-<br>bis(ethoxycarbonyl)-<br>2,2'-bpy | (E)-2-(((4-<br>aminopyridin-3-<br>yl)imino)methyl)-<br>4,6-di-<br>chlorophenol | <p><b>PSB5</b></p>                |
| <b>R8</b>        | 4,4'-<br>bis(ethoxycarbonyl)-<br>2,2'-bpy | (E)-2-(((4-<br>aminopyridin-3-<br>yl)imino)methyl)-<br>4-chlorophenol          | <p><b>PSB6</b></p>                |

| Re(I)<br>Complex | (N,N)                                     | Pyridine Schiff<br>Base                                                                | Structure Pyridine<br>Schiff Base                                                  |
|------------------|-------------------------------------------|----------------------------------------------------------------------------------------|------------------------------------------------------------------------------------|
| <b>R9</b>        | 4,4'-<br>bis(ethoxycarbonyl)-<br>2,2'-bpy | <i>(E)</i> -2-(((4-<br>aminopyridin-3-<br>yl)imino)methyl)-<br>4,6-di-<br>fluorophenol |  |
| <b>R10</b>       | 4,4'-<br>bis(ethoxycarbonyl)-<br>2,2'-bpy | <i>(E)</i> -2-(((4-<br>aminopyridin-3-<br>yl)imino)methyl)-<br>4-fluorophenol          |  |

**Table S2.** Optimized geometry parameters for **R1** to **R4** in the ground state.

| Parameters             | R1     | R2     | R3     | R4     |
|------------------------|--------|--------|--------|--------|
| <b>Bond length (Å)</b> |        |        |        |        |
| Re-N (L)               | 2.249  | 2.246  | 2.249  | 2.248  |
| Re-N(dinitrogenated)*  | 2.195  | 2.193  | 2.193  | 2.193  |
| Re-CO(axial)           | 1.938  | 1.938  | 1.939  | 1.939  |
| Re-CO(eq)*             | 1.932  | 1.932  | 1.933  | 1.933  |
| C=O (axial)            | 1.159  | 1.159  | 1.159  | 1.159  |
| C=O (eq)*              | 1.162  | 1.162  | 1.162  | 1.162  |
| N=C(azomethine)        | 1.309  | 1.307  | 1.290  | 1.305  |
| <b>Bond angle (°)</b>  |        |        |        |        |
| N-Re-N(L)              | 86.00  | 85.26  | 85.41  | 86.34  |
| N-Re-N                 | 74.31  | 74.31  | 74.36  | 74.37  |
| N-Re-C(eq)             | 171.82 | 171.75 | 171.61 | 172.12 |
| C(axial)-Re-N(L)       | 179.62 | 179.19 | 179.57 | 179.51 |
| C(eq)-Re-C(axial)      | 89.66  | 89.49  | 89.58  | 89.34  |

\*average values of two bond distances

**Table S3.** Optimized geometry parameters for **R5** to **R10** in the ground state.

| Parameters                | R5     | R6     | R7     | R8     | R9     | R10    |
|---------------------------|--------|--------|--------|--------|--------|--------|
| <b>Bond length (Å)</b>    |        |        |        |        |        |        |
| Re-N (L)                  | 2.250  | 2.250  | 2.246  | 2.247  | 2.247  | 2.251  |
| Re-                       | 2.194  | 2.194  | 2.191  | 2.191  | 2.193  | 2.191  |
| <b>N(dinitrogenated)*</b> |        |        |        |        |        |        |
| Re-CO(axial)              | 1.938  | 1.938  | 1.939  | 1.939  | 1.939  | 1.939  |
| Re-CO(eq)*                | 1.932  | 1.932  | 1.933  | 1.933  | 1.932  | 1.933  |
| C=O (axial)               | 1.159  | 1.159  | 1.159  | 1.159  | 1.159  | 1.159  |
| C=O (eq)*                 | 1.162  | 1.162  | 1.162  | 1.162  | 1.162  | 1.162  |
| N=C (azomethine)          | 1.309  | 1.308  | 1.289  | 1.307  | 1.289  | 1.306  |
| <b>Bond angle (°)</b>     |        |        |        |        |        |        |
| N-Re-N(L)                 | 87.61  | 85.54  | 89.20  | 86.04  | 86.61  | 86.75  |
| N-Re-N                    | 74.38  | 74.52  | 74.29  | 74.41  | 74.42  | 74.44  |
| N-Re-C(eq)                | 172.07 | 171.72 | 171.88 | 171.68 | 171.63 | 172.02 |
| C(axial)-Re-N(L)          | 179.56 | 179.56 | 179.23 | 179.06 | 179.72 | 179.64 |
| C(eq)-Re-C(axial)         | 89.29  | 89.53  | 89.01  | 89.44  | 89.46  | 89.43  |

\*average values of two bond distances

**Table S4.** Calculated C-O frequencies for **R1** to **R10** complexes.

| Complex    | $\nu_{CO}$ (cm <sup>-1</sup> ) |      |      |
|------------|--------------------------------|------|------|
| <b>R1</b>  | 1950                           | 1966 | 2033 |
| <b>R2</b>  | 1952                           | 1967 | 2034 |
| <b>R3</b>  | 1951                           | 1965 | 2032 |
| <b>R4</b>  | 1951                           | 1965 | 2032 |
| <b>R5</b>  | 1949                           | 1966 | 2033 |
| <b>R6</b>  | 1952                           | 1967 | 2034 |
| <b>R7</b>  | 1952                           | 1966 | 2032 |
| <b>R8</b>  | 1952                           | 1969 | 2034 |
| <b>R9</b>  | 1952                           | 1965 | 2032 |
| <b>R10</b> | 1951                           | 1968 | 2033 |

**Table S5.** Geometrical parameters for the atoms involved in the intramolecular hydrogen bond for **R1** to **R10** complexes in the singlet state.

| Complex    | Singlet state   |       |        |                                                                |                                                   |                                    |                         |
|------------|-----------------|-------|--------|----------------------------------------------------------------|---------------------------------------------------|------------------------------------|-------------------------|
|            | Bond length (Å) |       |        | Bond angle (°)                                                 |                                                   |                                    |                         |
|            | C-O             | O-H   | H...A* | C <sub>7</sub> N <sub>4</sub> =C <sub>13</sub> C <sub>14</sub> | C <sub>13</sub> C <sub>14</sub> C <sub>15</sub> O | C <sub>14</sub> C <sub>15</sub> OH | C <sub>15</sub> OH...A* |
| <b>R1</b>  | 1.346           | 1.009 | 1.685  | 174.85                                                         | -0.12                                             | 0.38                               | 3.38                    |
| <b>R2</b>  | 1.344           | 1.007 | 1.699  | 173.76                                                         | 0.30                                              | 0.63                               | 2.20                    |
| <b>R3</b>  | 1.355           | 0.978 | 2.129  | 176.44                                                         | 0.33                                              | -179.53                            | -0.45                   |
| <b>R4</b>  | 1.345           | 1.007 | 1.701  | 175.16                                                         | -0.05                                             | 0.03                               | 3.65                    |
| <b>R5</b>  | 1.346           | 1.007 | 1.694  | 173.79                                                         | 0.31                                              | -0.79                              | 5.16                    |
| <b>R6</b>  | 1.344           | 1.007 | 1.703  | 173.30                                                         | 0.45                                              | 0.12                               | 2.83                    |
| <b>R7</b>  | 1.348           | 0.984 | 2.268  | 176.41                                                         | 0.63                                              | -179.35                            | -1.01                   |
| <b>R8</b>  | 1.342           | 1.008 | 1.702  | 173.68                                                         | 0.16                                              | -1.47                              | 5.83                    |
| <b>R9</b>  | 1.355           | 0.978 | 2.125  | 176.37                                                         | 0.86                                              | -179.22                            | -1.01                   |
| <b>R10</b> | 1.344           | 1.008 | 1.690  | 175.27                                                         | -0.41                                             | -0.97                              | 5.51                    |

\*A: N<sub>4</sub>, except in **R3**, **R9** (A: F<sub>26</sub>) and **R7** (A: Cl<sub>26</sub>)

**Table S6.** Geometrical parameters for the atoms involved in the intramolecular hydrogen bond for **R1** to **R10** complexes in T<sub>1</sub> state.

| Complex    | Triplet state   |       |        |                                                                |                                                   |                                    |                         |
|------------|-----------------|-------|--------|----------------------------------------------------------------|---------------------------------------------------|------------------------------------|-------------------------|
|            | Bond length (Å) |       |        | Bond angle (°)                                                 |                                                   |                                    |                         |
|            | C-O             | O-H   | H...A* | C <sub>7</sub> N <sub>4</sub> =C <sub>13</sub> C <sub>14</sub> | C <sub>13</sub> C <sub>14</sub> C <sub>15</sub> O | C <sub>14</sub> C <sub>15</sub> OH | C <sub>15</sub> OH...A* |
| <b>R1</b>  | 1.326           | 1.049 | 1.555  | 171.23                                                         | -1.97                                             | 3.15                               | 3.39                    |
| <b>R2</b>  | 1.329           | 1.035 | 1.601  | 169.43                                                         | -1.86                                             | 2.74                               | 3.63                    |
| <b>R3</b>  | 1.355           | 0.980 | 2.116  | 152.86                                                         | -3.78                                             | 176.83                             | 3.77                    |
| <b>R4</b>  | 1.328           | 1.040 | 1.584  | 170.64                                                         | -2.61                                             | 3.69                               | 3.62                    |
| <b>R5</b>  | 1.327           | 1.042 | 1.578  | 171.50                                                         | -1.60                                             | 2.15                               | 4.27                    |
| <b>R6</b>  | 1.329           | 1.032 | 1.615  | 169.37                                                         | -1.37                                             | 2.09                               | 3.88                    |
| <b>R7</b>  | 1.343           | 0.986 | 2.259  | 160.68                                                         | -4.05                                             | 178.66                             | 1.77                    |
| <b>R8</b>  | 1.326           | 1.038 | 1.592  | 170.97                                                         | -1.74                                             | 2.123                              | 4.50                    |
| <b>R9</b>  | 1.352           | 0.979 | 2.118  | 157.22                                                         | -3.43                                             | 177.97                             | 2.40                    |
| <b>R10</b> | 1.327           | 1.039 | 1.585  | 170.61                                                         | -1.96                                             | 2.24                               | 4.55                    |

\*A: N<sub>4</sub>, except in **R3**, **R9** (A: F<sub>26</sub>) and **R7** (A: Cl<sub>26</sub>)



## Section 2: Supplementary Figures

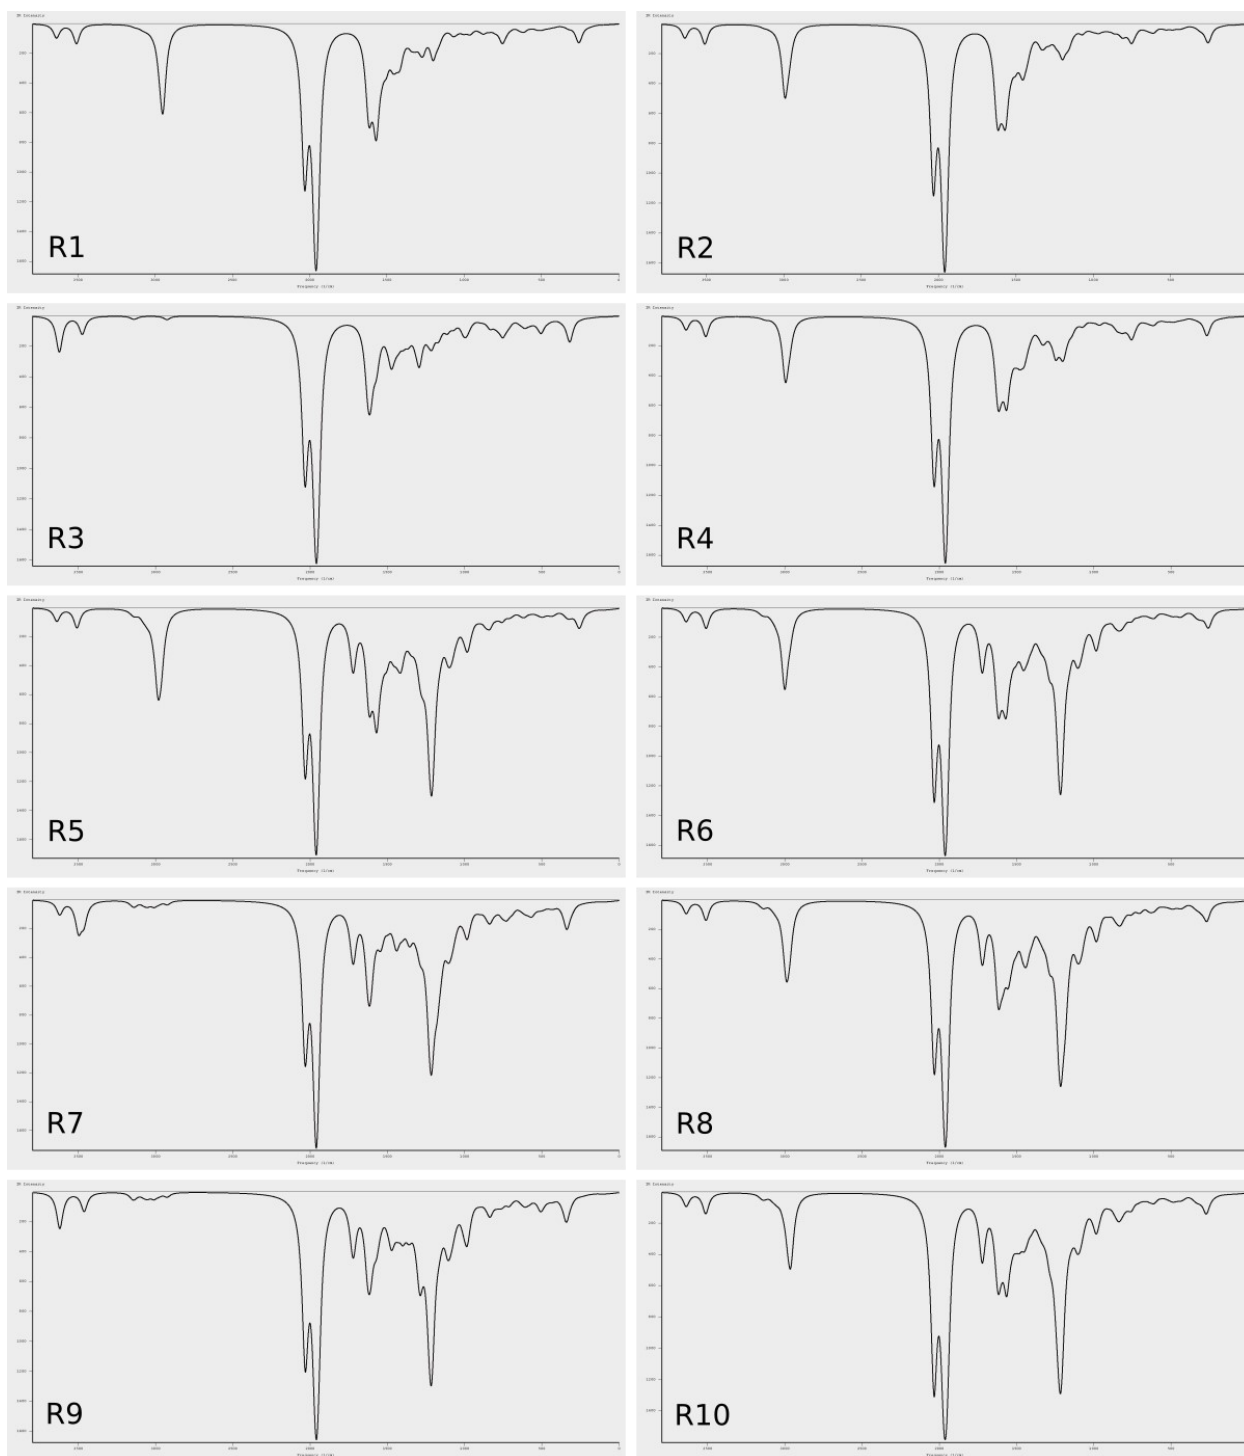

**Figure S1.** Computed frequencies analysis of R1 to R10 complexes.

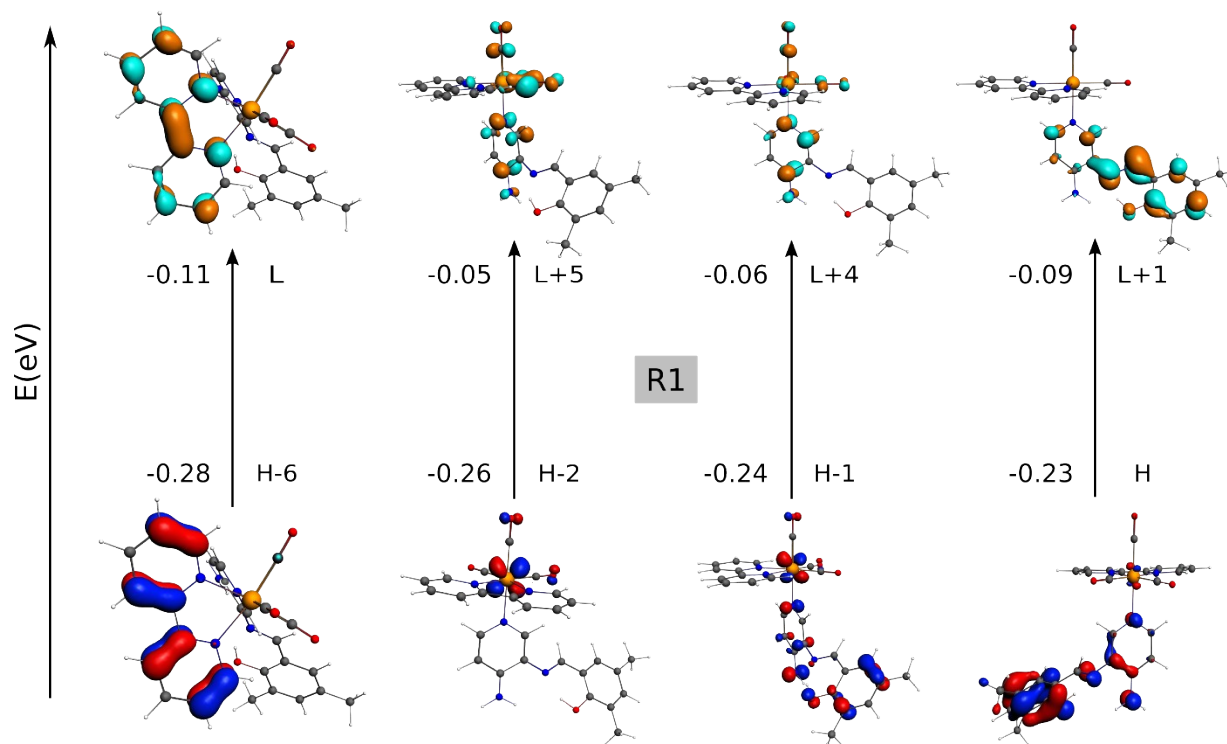

**Figure S2.** Responsible transitions for the main absorptions for R1.

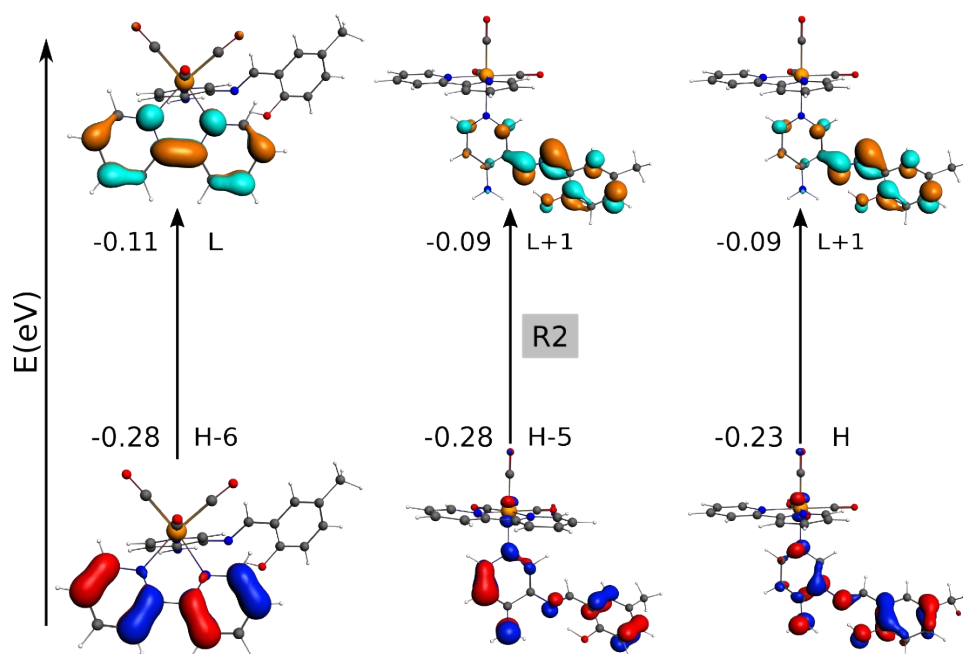

**Figure S3.** Responsible transitions for the main absorptions for R2.

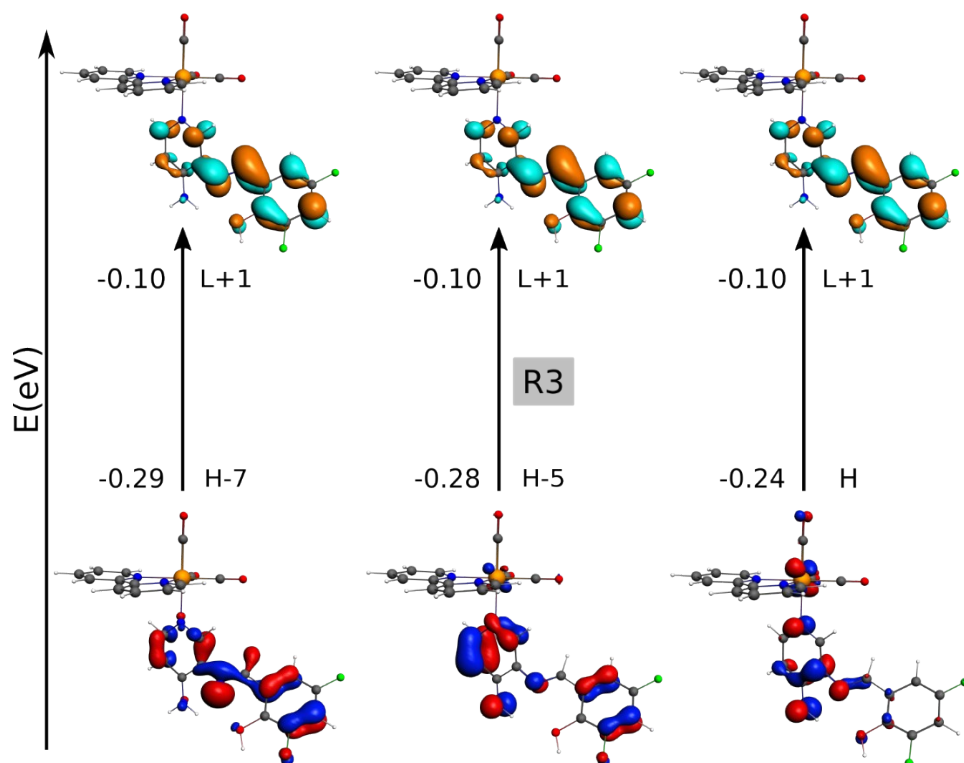

**Figure S4.** Responsible transitions for the main absorptions for **R3**.

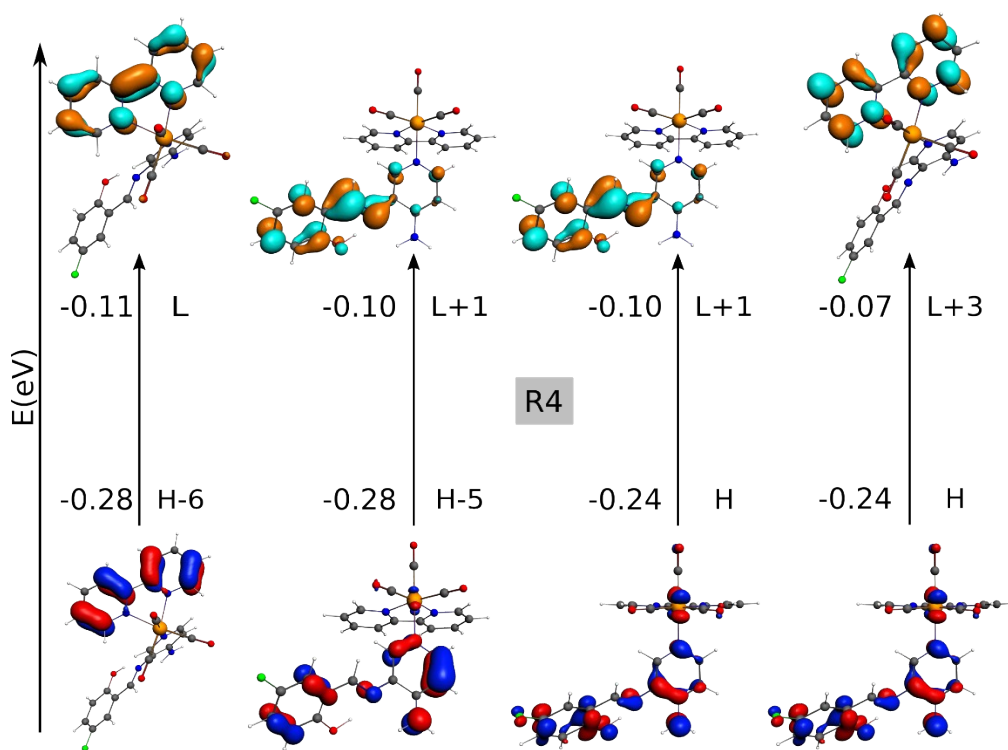

**Figure S5.** Responsible transitions for the main absorptions for **R4**.

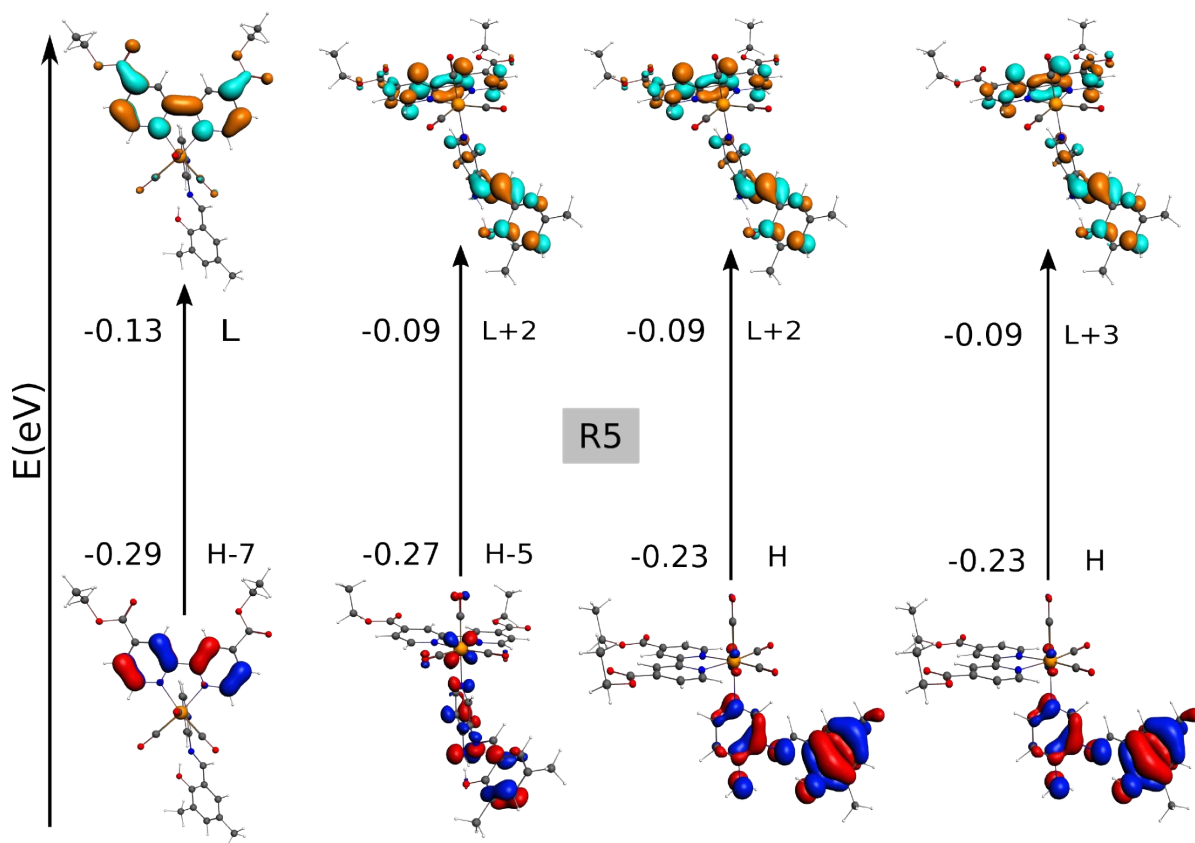

**Figure S6.** Responsible transitions for the main absorptions for R5.

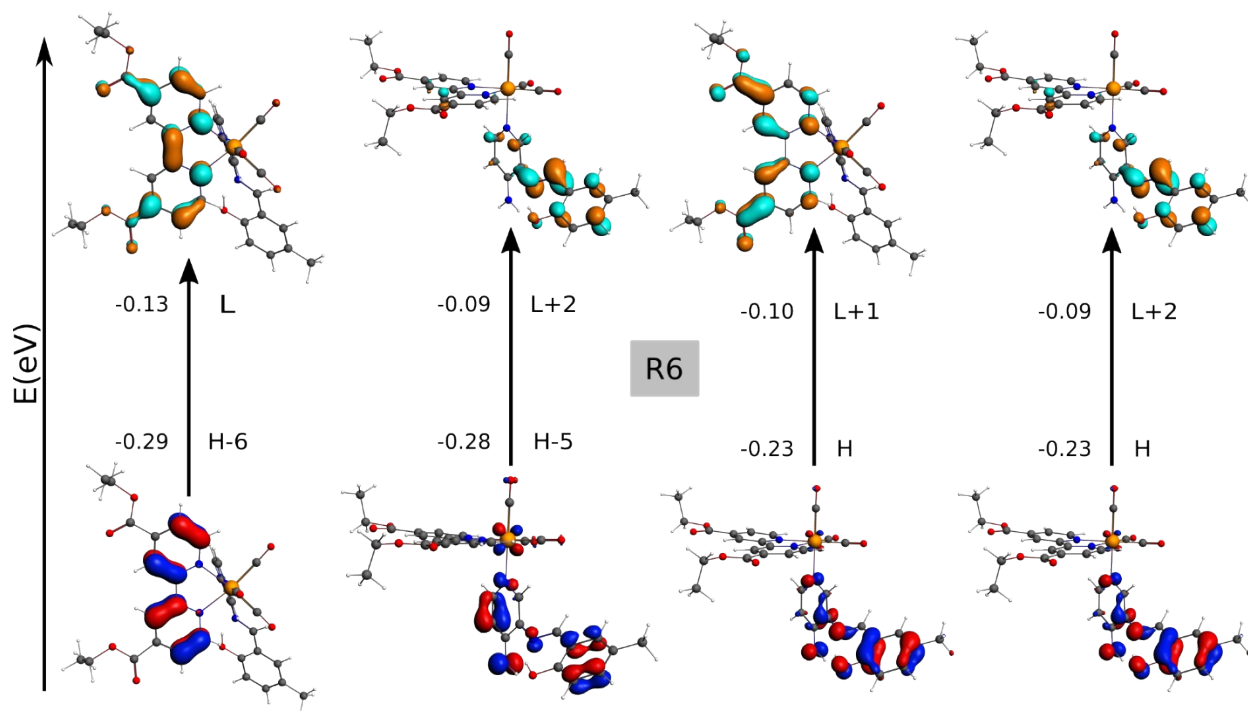

**Figure S7.** Responsible transitions for the main absorptions for R6.

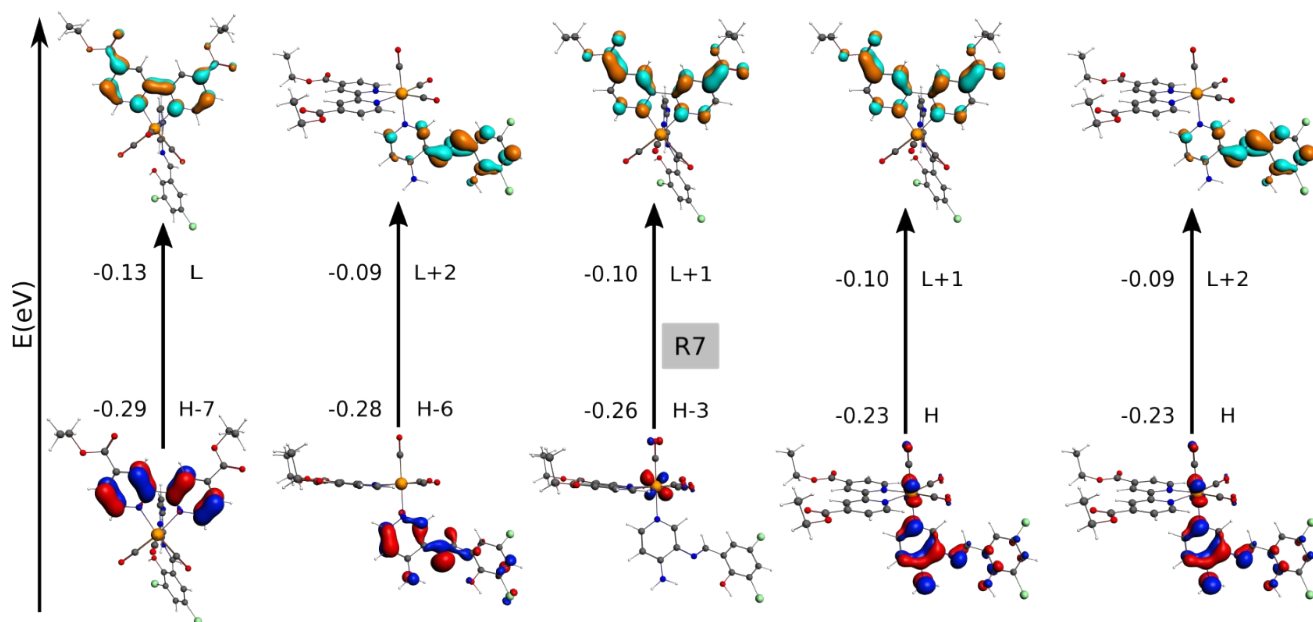

**Figure S8.** Responsible transitions for the main absorptions for R7.

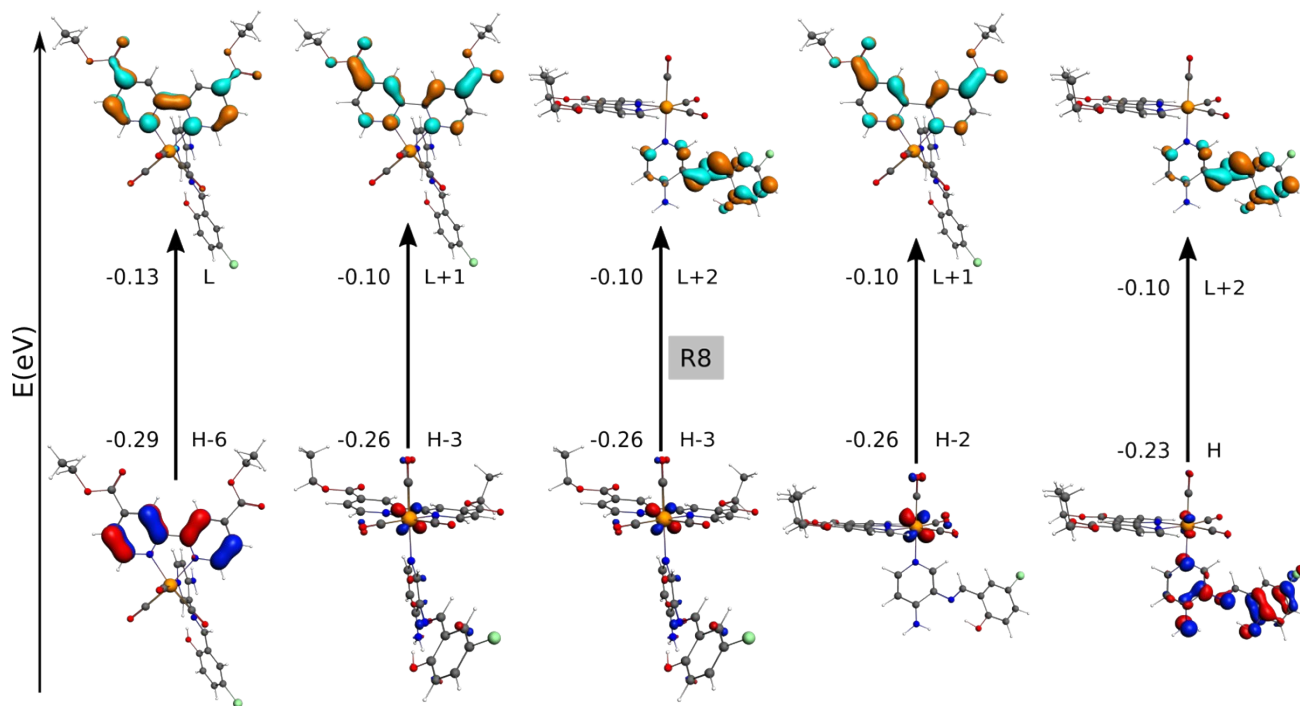

**Figure S9.** Responsible transitions for the main absorptions for R8.

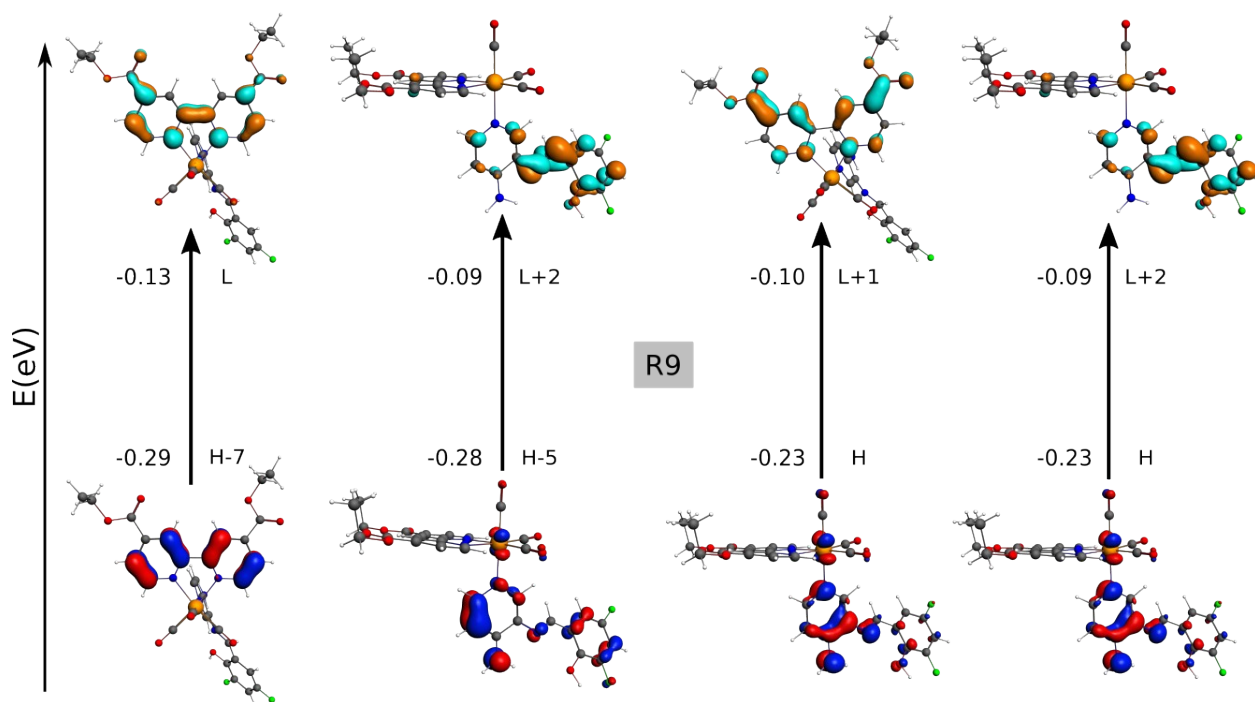

**Figure S10.** Responsible transitions for the main absorptions for R9.

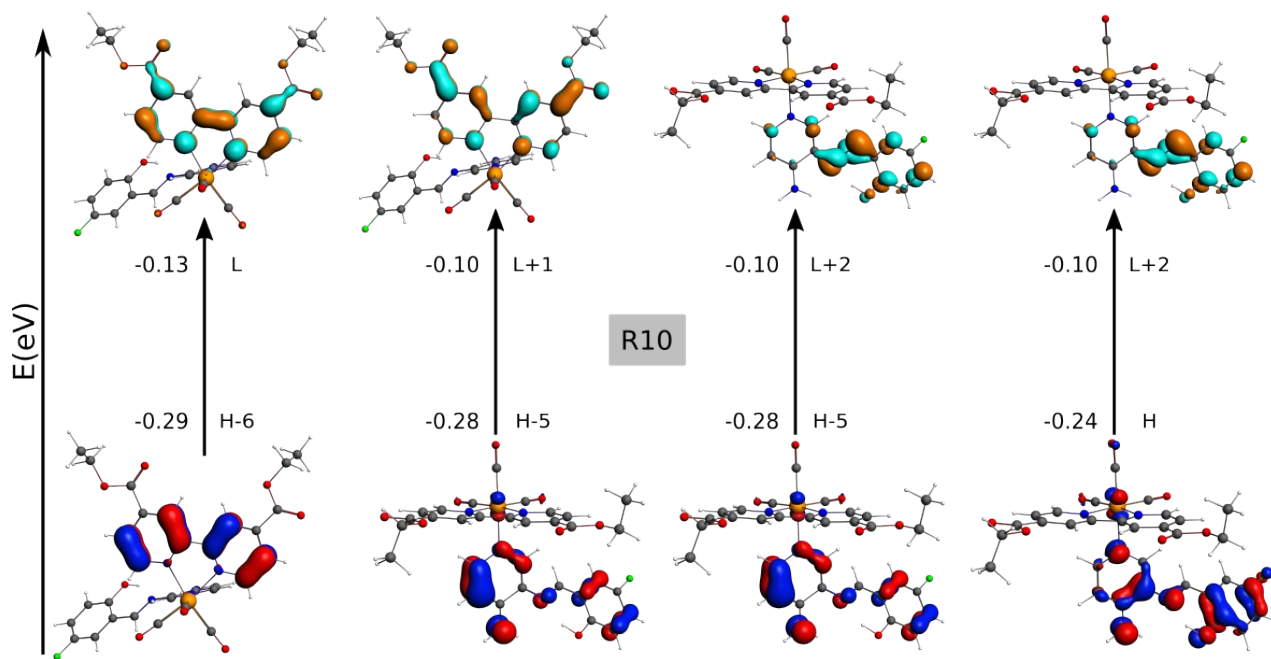

**Figure S11.** Responsible transitions for the main absorptions for R10.

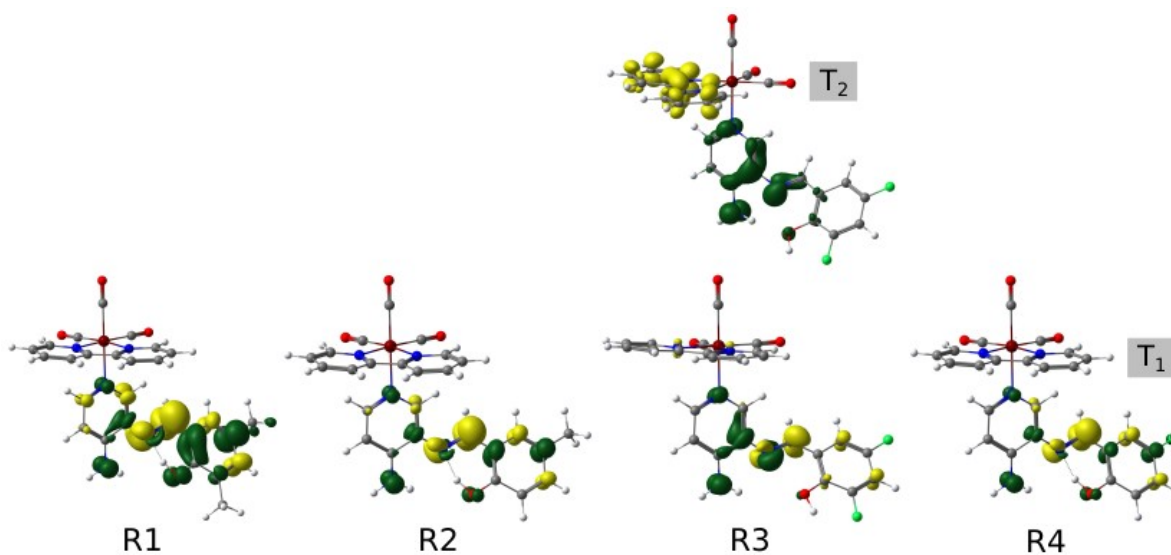

**Figure S12.** Electron density differences maps between the states involved in the electronic transitions of the emissions for **R1** to **R4** complexes (**yellow** represents a density reduction and **green** density increment as a consequence of the transition).

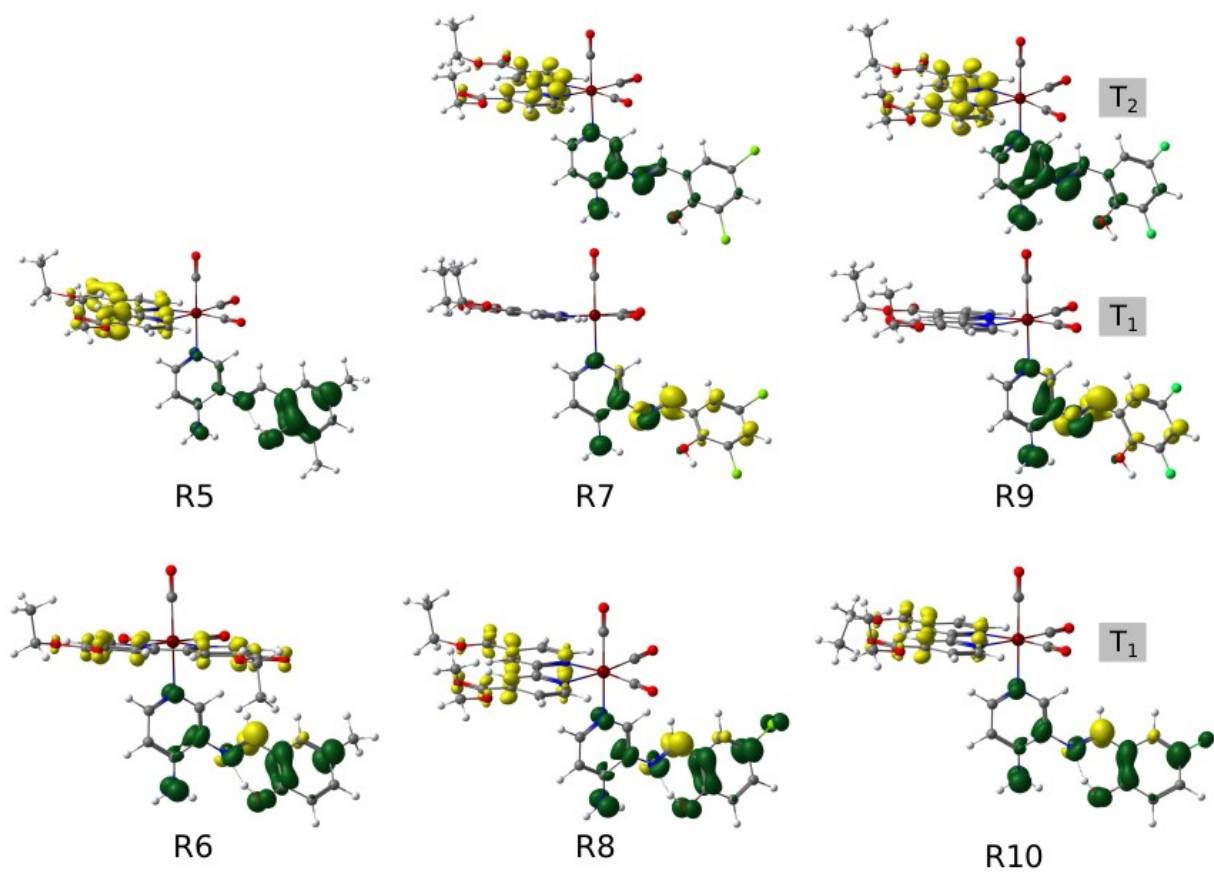

**Figure S13.** Electron density differences maps between the states involved in the electronic transitions of the emissions for **R5** to **R10** complexes (**yellow** represents a density reduction and **green** density increment as a consequence of the transition).



### Section 3. Optimized cartesian coordinates (xyz) of all complexes

#### Complex R1

#### Ground state ( $S_0$ )

|    |              |              |              |
|----|--------------|--------------|--------------|
| Re | -0.175671000 | -0.368119000 | 1.002179000  |
| O  | 1.780582000  | 3.919376000  | 7.408832000  |
| H  | 1.178074000  | 3.331300000  | 6.852615000  |
| O  | 2.733899000  | -0.910418000 | 1.897211000  |
| O  | -0.994723000 | -3.238467000 | 1.818541000  |
| O  | 0.589403000  | -1.406394000 | -1.813385000 |
| N  | -0.733224000 | 0.392122000  | 3.043914000  |
| N  | 0.927760000  | 1.906709000  | 5.988228000  |
| N  | -2.145034000 | 0.299303000  | 0.301119000  |
| N  | 0.073610000  | 1.742034000  | 0.453115000  |
| C  | 0.204431000  | 0.921607000  | 3.868744000  |
| H  | 1.206606000  | 1.043772000  | 3.460461000  |
| C  | -0.041321000 | 1.330970000  | 5.173837000  |
| C  | -1.372874000 | 1.222726000  | 5.681579000  |
| C  | -2.337489000 | 0.670817000  | 4.819243000  |
| H  | -3.366779000 | 0.539700000  | 5.152989000  |
| C  | -1.984401000 | 0.269707000  | 3.545800000  |
| H  | -2.731454000 | -0.174660000 | 2.890832000  |
| C  | 2.142603000  | 1.423913000  | 6.051508000  |
| C  | 3.189077000  | 2.055056000  | 6.795010000  |
| C  | 2.973115000  | 3.296444000  | 7.459134000  |
| C  | 4.016214000  | 3.902337000  | 8.189707000  |
| C  | 5.240014000  | 3.244028000  | 8.239538000  |
| H  | 6.047826000  | 3.710020000  | 8.809792000  |

|   |              |              |              |
|---|--------------|--------------|--------------|
| C | 5.494058000  | 2.010069000  | 7.598887000  |
| C | 4.460635000  | 1.435912000  | 6.880938000  |
| H | 4.611493000  | 0.482133000  | 6.369915000  |
| C | -3.216852000 | -0.514207000 | 0.174919000  |
| H | -3.067077000 | -1.551822000 | 0.469528000  |
| C | -4.440499000 | -0.075211000 | -0.309793000 |
| H | -5.267353000 | -0.778344000 | -0.395992000 |
| C | -4.575603000 | 1.262019000  | -0.679753000 |
| C | -3.476965000 | 2.104263000  | -0.561006000 |
| H | -3.559869000 | 3.146861000  | -0.859735000 |
| C | -2.265062000 | 1.605966000  | -0.071950000 |
| C | -1.037826000 | 2.411812000  | 0.031276000  |
| C | -0.974456000 | 3.766112000  | -0.309662000 |
| H | -1.868524000 | 4.290336000  | -0.639698000 |
| C | 0.236238000  | 4.444062000  | -0.234837000 |
| C | 1.369587000  | 3.749306000  | 0.182919000  |
| H | 2.343343000  | 4.231904000  | 0.249286000  |
| C | 1.246184000  | 2.408160000  | 0.518268000  |
| H | 2.108980000  | 1.828250000  | 0.841848000  |
| C | 1.632728000  | -0.728806000 | 1.569301000  |
| C | -0.663317000 | -2.168130000 | 1.514551000  |
| C | 0.300741000  | -1.011953000 | -0.762281000 |
| C | 6.847354000  | 1.361949000  | 7.712168000  |
| H | 7.096771000  | 1.147013000  | 8.761392000  |
| H | 6.887402000  | 0.417441000  | 7.155982000  |
| H | 7.637595000  | 2.019410000  | 7.321744000  |
| C | 3.775941000  | 5.213032000  | 8.881268000  |
| H | 3.475864000  | 5.990039000  | 8.163396000  |

|   |              |             |              |
|---|--------------|-------------|--------------|
| H | 2.957014000  | 5.131786000 | 9.610454000  |
| H | 4.677412000  | 5.550563000 | 9.405273000  |
| N | -1.647108000 | 1.621750000 | 6.940235000  |
| H | -2.576579000 | 1.543664000 | 7.329970000  |
| H | -0.900524000 | 1.981681000 | 7.523102000  |
| H | 2.392224000  | 0.481699000 | 5.535284000  |
| H | -5.521292000 | 1.641852000 | -1.064976000 |
| H | 0.294429000  | 5.498096000 | -0.504181000 |

**Complex R1**

**Triplet state ( $T_1$ )**

|    |              |              |              |
|----|--------------|--------------|--------------|
| Re | -0.200742000 | -0.391609000 | 0.996752000  |
| O  | 1.681732000  | 3.491687000  | 7.743547000  |
| H  | 1.155088000  | 2.884980000  | 7.068490000  |
| O  | 2.725298000  | -0.919827000 | 1.844943000  |
| O  | -1.021137000 | -3.226039000 | 1.946310000  |
| O  | 0.476932000  | -1.555216000 | -1.790943000 |
| N  | -0.696453000 | 0.461483000  | 3.025061000  |
| N  | 1.019485000  | 1.729109000  | 6.037906000  |
| N  | -2.182026000 | 0.252175000  | 0.317758000  |
| N  | 0.054404000  | 1.688642000  | 0.376978000  |
| C  | 0.272736000  | 0.865158000  | 3.864737000  |
| H  | 1.289336000  | 0.852377000  | 3.478936000  |
| C  | 0.046620000  | 1.318489000  | 5.184330000  |
| C  | -1.322309000 | 1.372102000  | 5.637508000  |
| C  | -2.321546000 | 0.973140000  | 4.735905000  |
| H  | -3.370293000 | 0.990679000  | 5.031944000  |
| C  | -1.980343000 | 0.520384000  | 3.475818000  |

|   |              |              |              |
|---|--------------|--------------|--------------|
| H | -2.750882000 | 0.177248000  | 2.790272000  |
| C | 2.325448000  | 1.431705000  | 5.881344000  |
| C | 3.304499000  | 2.045267000  | 6.703408000  |
| C | 2.941228000  | 3.083533000  | 7.662254000  |
| C | 3.910644000  | 3.685567000  | 8.513678000  |
| C | 5.223331000  | 3.267066000  | 8.393803000  |
| H | 5.983674000  | 3.717561000  | 9.033955000  |
| C | 5.619775000  | 2.262763000  | 7.462877000  |
| C | 4.660582000  | 1.676913000  | 6.637478000  |
| H | 4.961451000  | 0.901410000  | 5.930680000  |
| C | -3.261757000 | -0.556319000 | 0.228496000  |
| H | -3.109790000 | -1.589718000 | 0.537428000  |
| C | -4.494814000 | -0.121650000 | -0.230044000 |
| H | -5.325926000 | -0.822137000 | -0.286024000 |
| C | -4.632110000 | 1.217611000  | -0.616857000 |
| C | -3.531610000 | 2.054530000  | -0.540480000 |
| H | -3.618854000 | 3.092828000  | -0.853116000 |
| C | -2.300035000 | 1.562262000  | -0.075692000 |
| C | -1.076410000 | 2.353194000  | -0.030776000 |
| C | -1.006784000 | 3.702621000  | -0.414388000 |
| H | -1.907219000 | 4.224335000  | -0.731217000 |
| C | 0.206900000  | 4.368986000  | -0.402222000 |
| C | 1.356567000  | 3.675515000  | -0.003746000 |
| H | 2.335689000  | 4.150734000  | 0.009847000  |
| C | 1.233048000  | 2.349529000  | 0.376700000  |
| H | 2.102375000  | 1.771976000  | 0.687520000  |
| C | 1.616979000  | -0.740899000 | 1.532108000  |
| C | -0.693639000 | -2.169204000 | 1.593305000  |

|   |              |              |              |
|---|--------------|--------------|--------------|
| C | 0.220747000  | -1.113307000 | -0.750736000 |
| C | 7.054722000  | 1.849938000  | 7.400206000  |
| H | 7.387267000  | 1.457644000  | 8.374354000  |
| H | 7.231893000  | 1.082849000  | 6.638302000  |
| H | 7.699233000  | 2.716286000  | 7.183769000  |
| C | 3.480467000  | 4.745346000  | 9.480635000  |
| H | 3.043221000  | 5.605795000  | 8.953363000  |
| H | 2.700152000  | 4.368942000  | 10.157751000 |
| H | 4.328157000  | 5.095605000  | 10.079660000 |
| N | -1.594395000 | 1.777981000  | 6.892223000  |
| H | -2.541554000 | 1.778888000  | 7.248816000  |
| H | -0.834083000 | 1.942534000  | 7.541364000  |
| H | 2.654611000  | 0.673475000  | 5.161887000  |
| H | -5.585929000 | 1.596044000  | -0.983031000 |
| H | 0.263678000  | 5.413587000  | -0.706549000 |

### Complex R2

#### Ground state ( $S_0$ )

|    |              |              |              |
|----|--------------|--------------|--------------|
| Re | -0.039904000 | 0.052937000  | 0.110447000  |
| O  | 6.612534000  | -3.011497000 | -2.858616000 |
| H  | 6.097787000  | -2.391422000 | -2.254327000 |
| O  | -0.150356000 | -3.026245000 | 0.374174000  |
| O  | -0.125375000 | 0.360428000  | 3.188658000  |
| O  | -3.135808000 | 0.097618000  | 0.045761000  |
| N  | 2.206139000  | 0.023073000  | 0.132056000  |
| N  | 4.957542000  | -2.173886000 | -1.013957000 |
| N  | 0.089313000  | 2.186690000  | -0.380895000 |
| N  | 0.163602000  | 0.148009000  | -2.071184000 |

|   |              |              |              |
|---|--------------|--------------|--------------|
| C | 2.891613000  | -1.016860000 | -0.403889000 |
| H | 2.304130000  | -1.796136000 | -0.887582000 |
| C | 4.276514000  | -1.127046000 | -0.400540000 |
| C | 5.041454000  | -0.071042000 | 0.184242000  |
| C | 4.320359000  | 0.996590000  | 0.749688000  |
| H | 4.843146000  | 1.821330000  | 1.233938000  |
| C | 2.940285000  | 1.002676000  | 0.709741000  |
| H | 2.386748000  | 1.824682000  | 1.160367000  |
| C | 4.573550000  | -3.415934000 | -0.874639000 |
| C | 5.176117000  | -4.495150000 | -1.597371000 |
| C | 6.183801000  | -4.254257000 | -2.577522000 |
| C | 6.738327000  | -5.340348000 | -3.267166000 |
| C | 6.314253000  | -6.628930000 | -2.985395000 |
| H | 6.764545000  | -7.460492000 | -3.531611000 |
| C | 5.322317000  | -6.905747000 | -2.016696000 |
| C | 4.769790000  | -5.828372000 | -1.343871000 |
| H | 3.998988000  | -5.997906000 | -0.587984000 |
| C | -0.047726000 | 3.180662000  | 0.524004000  |
| H | -0.225928000 | 2.869690000  | 1.552278000  |
| C | 0.020175000  | 4.523592000  | 0.181838000  |
| H | -0.105380000 | 5.281305000  | 0.953773000  |
| C | 0.243968000  | 4.866555000  | -1.150545000 |
| C | 0.376823000  | 3.851587000  | -2.089870000 |
| H | 0.535966000  | 4.101030000  | -3.136491000 |
| C | 0.289655000  | 2.514459000  | -1.689849000 |
| C | 0.351772000  | 1.380491000  | -2.625532000 |
| C | 0.547319000  | 1.527038000  | -4.002200000 |
| H | 0.702581000  | 2.514317000  | -4.431459000 |

|   |              |              |              |
|---|--------------|--------------|--------------|
| C | 0.537747000  | 0.408949000  | -4.826801000 |
| C | 0.324653000  | -0.844266000 | -4.255655000 |
| H | 0.295169000  | -1.749627000 | -4.859881000 |
| C | 0.144274000  | -0.931348000 | -2.882272000 |
| H | -0.033303000 | -1.890512000 | -2.398516000 |
| C | -0.111424000 | -1.866241000 | 0.301528000  |
| C | -0.099353000 | 0.220007000  | 2.036448000  |
| C | -1.977129000 | 0.085123000  | 0.065168000  |
| C | 4.904504000  | -8.324038000 | -1.738655000 |
| H | 5.746490000  | -8.914781000 | -1.348951000 |
| H | 4.093627000  | -8.367155000 | -1.001502000 |
| H | 4.558419000  | -8.823632000 | -2.654926000 |
| N | 6.387744000  | -0.140808000 | 0.192769000  |
| H | 6.953305000  | 0.587816000  | 0.606476000  |
| H | 6.848648000  | -0.948337000 | -0.209977000 |
| H | 3.764228000  | -3.671723000 | -0.169983000 |
| H | 0.304554000  | 5.910609000  | -1.456085000 |
| H | 0.687558000  | 0.515791000  | -5.900680000 |
| H | 7.505723000  | -5.146782000 | -4.016480000 |

### Complex R2

#### Triplet state ( $T_1$ )

|    |              |              |              |
|----|--------------|--------------|--------------|
| Re | -0.001655000 | 0.100336000  | 0.095797000  |
| O  | 7.045284000  | -3.152304000 | -1.946349000 |
| H  | 6.366779000  | -2.554760000 | -1.442788000 |
| O  | -0.102817000 | -2.973411000 | 0.416744000  |
| O  | 0.001737000  | 0.476359000  | 3.173005000  |
| O  | -3.097463000 | 0.153509000  | 0.134469000  |

|   |              |              |              |
|---|--------------|--------------|--------------|
| N | 2.246427000  | 0.049764000  | 0.069926000  |
| N | 4.998308000  | -2.298007000 | -0.653467000 |
| N | 0.111586000  | 2.223359000  | -0.434450000 |
| N | 0.135896000  | 0.141379000  | -2.084213000 |
| C | 2.911849000  | -1.046175000 | -0.328819000 |
| H | 2.315687000  | -1.851372000 | -0.751864000 |
| C | 4.317561000  | -1.199306000 | -0.251128000 |
| C | 5.071719000  | -0.081847000 | 0.271886000  |
| C | 4.357431000  | 1.066978000  | 0.651129000  |
| H | 4.881280000  | 1.934782000  | 1.051403000  |
| C | 2.980242000  | 1.091685000  | 0.553191000  |
| H | 2.421700000  | 1.966533000  | 0.877735000  |
| C | 4.411824000  | -3.497456000 | -0.867528000 |
| C | 5.122377000  | -4.547575000 | -1.496023000 |
| C | 6.469700000  | -4.348342000 | -2.019514000 |
| C | 7.170111000  | -5.413098000 | -2.616280000 |
| C | 6.574470000  | -6.650693000 | -2.732387000 |
| H | 7.116332000  | -7.471686000 | -3.202834000 |
| C | 5.251011000  | -6.882636000 | -2.241517000 |
| C | 4.560188000  | -5.835676000 | -1.641798000 |
| H | 3.553876000  | -6.010178000 | -1.255869000 |
| C | 0.004014000  | 3.240634000  | 0.448570000  |
| H | -0.143643000 | 2.954796000  | 1.489237000  |
| C | 0.065046000  | 4.574056000  | 0.076595000  |
| H | -0.036317000 | 5.349448000  | 0.833795000  |
| C | 0.248827000  | 4.884759000  | -1.275970000 |
| C | 0.349760000  | 3.852003000  | -2.193333000 |
| H | 0.477430000  | 4.077947000  | -3.249667000 |



|   |              |              |              |
|---|--------------|--------------|--------------|
| C | 0.271690000  | 2.516770000  | -1.765401000 |
| C | 0.292828000  | 1.373178000  | -2.670257000 |
| C | 0.417209000  | 1.486039000  | -4.064233000 |
| H | 0.545519000  | 2.464878000  | -4.520982000 |
| C | 0.364418000  | 0.355972000  | -4.862703000 |
| C | 0.179534000  | -0.892791000 | -4.256524000 |
| H | 0.114612000  | -1.808507000 | -4.841395000 |
| C | 0.073497000  | -0.951932000 | -2.877035000 |
| H | -0.079609000 | -1.901668000 | -2.366587000 |
| C | -0.070394000 | -1.813063000 | 0.321606000  |
| C | -0.001926000 | 0.312721000  | 2.023356000  |
| C | -1.939285000 | 0.138543000  | 0.114494000  |
| C | 4.648768000  | -8.244336000 | -2.375367000 |
| H | 5.274842000  | -8.996857000 | -1.870604000 |
| H | 3.638432000  | -8.293411000 | -1.954363000 |
| H | 4.602389000  | -8.545363000 | -3.433903000 |
| N | 6.407327000  | -0.179470000 | 0.395484000  |
| H | 6.954926000  | 0.572916000  | 0.793732000  |
| H | 6.864868000  | -1.064069000 | 0.206558000  |
| H | 3.396449000  | -3.702695000 | -0.509760000 |
| H | 0.302096000  | 5.921370000  | -1.607177000 |
| H | 0.454596000  | 0.442615000  | -5.944987000 |
| H | 8.176725000  | -5.222112000 | -2.987839000 |

### Complex R3

#### Ground state ( $S_0$ )

|    |              |              |              |
|----|--------------|--------------|--------------|
| Re | -0.030891000 | -0.306923000 | 0.884438000  |
| O  | 1.946887000  | 3.840371000  | 7.734317000  |
| H  | 2.107161000  | 4.581603000  | 8.351694000  |
| O  | 2.909742000  | -0.658828000 | 1.772970000  |
| O  | -0.654787000 | -3.230346000 | 1.686467000  |
| O  | 0.807923000  | -1.282889000 | -1.932310000 |
| N  | -0.636165000 | 0.411304000  | 2.928871000  |
| N  | 0.945470000  | 1.915925000  | 5.929364000  |
| N  | -2.036338000 | 0.223400000  | 0.170700000  |
| N  | 0.071162000  | 1.820733000  | 0.360440000  |
| C  | 0.283275000  | 0.949596000  | 3.769476000  |
| H  | 1.283780000  | 1.104169000  | 3.368648000  |
| C  | 0.016375000  | 1.332573000  | 5.077752000  |
| C  | -1.321671000 | 1.204535000  | 5.566085000  |
| C  | -2.265450000 | 0.633534000  | 4.692802000  |
| H  | -3.296416000 | 0.481475000  | 5.011949000  |
| C  | -1.887952000 | 0.250219000  | 3.420241000  |
| H  | -2.616876000 | -0.206759000 | 2.753397000  |
| C  | 2.160056000  | 1.483255000  | 5.954723000  |
| C  | 3.241674000  | 2.048989000  | 6.740455000  |
| C  | 3.120492000  | 3.179302000  | 7.583597000  |
| C  | 4.262298000  | 3.607531000  | 8.274430000  |
| C  | 5.493507000  | 2.988391000  | 8.185573000  |
| H  | 6.351310000  | 3.356777000  | 8.746064000  |
| C  | 5.584658000  | 1.874675000  | 7.350780000  |

|   |              |              |              |
|---|--------------|--------------|--------------|
| C | 4.497087000  | 1.406411000  | 6.641332000  |
| H | 4.611021000  | 0.532045000  | 6.001106000  |
| C | -3.041022000 | -0.666534000 | 0.011139000  |
| H | -2.821654000 | -1.692634000 | 0.302307000  |
| C | -4.281379000 | -0.315849000 | -0.502070000 |
| H | -5.050440000 | -1.078339000 | -0.615512000 |
| C | -4.506413000 | 1.010617000  | -0.866613000 |
| C | -3.478110000 | 1.931968000  | -0.710228000 |
| H | -3.630621000 | 2.967593000  | -1.005668000 |
| C | -2.245537000 | 1.521624000  | -0.192343000 |
| C | -1.085739000 | 2.416306000  | -0.050136000 |
| C | -1.125912000 | 3.782738000  | -0.342367000 |
| H | -2.056852000 | 4.248184000  | -0.658289000 |
| C | 0.027497000  | 4.549559000  | -0.232418000 |
| C | 1.209716000  | 3.929426000  | 0.166747000  |
| H | 2.143224000  | 4.482771000  | 0.256004000  |
| C | 1.188947000  | 2.571958000  | 0.454560000  |
| H | 2.092231000  | 2.049023000  | 0.764314000  |
| C | 1.797815000  | -0.546932000 | 1.449125000  |
| C | -0.397253000 | -2.138484000 | 1.388149000  |
| C | 0.490432000  | -0.911863000 | -0.880965000 |
| N | -1.594744000 | 1.599471000  | 6.824412000  |
| H | -2.538441000 | 1.599822000  | 7.187355000  |
| H | -0.860224000 | 2.079984000  | 7.337411000  |
| H | 2.454365000  | 0.597753000  | 5.360547000  |
| H | -5.466578000 | 1.321601000  | -1.277074000 |
| H | 0.004386000  | 5.614412000  | -0.461130000 |
| F | 6.774291000  | 1.244137000  | 7.240689000  |

|   |             |             |             |
|---|-------------|-------------|-------------|
| F | 4.107861000 | 4.700671000 | 9.070365000 |
|---|-------------|-------------|-------------|

**Complex R3**

**Triplet state (T<sub>1</sub>)**

|    |              |              |              |
|----|--------------|--------------|--------------|
| Re | 0.004823000  | -0.185983000 | 0.920871000  |
| O  | 1.943253000  | 3.559323000  | 7.715527000  |
| H  | 2.034797000  | 4.294054000  | 8.356389000  |
| O  | 2.994170000  | -0.360946000 | 1.688261000  |
| O  | -0.445673000 | -3.088358000 | 1.908056000  |
| O  | 0.781461000  | -1.279154000 | -1.867336000 |
| N  | -0.561081000 | 0.620313000  | 2.961446000  |
| N  | 0.980221000  | 1.446779000  | 6.194674000  |
| N  | -2.039081000 | 0.199655000  | 0.218031000  |
| N  | 0.002209000  | 1.902816000  | 0.265915000  |
| C  | 0.374003000  | 0.884593000  | 3.881952000  |
| H  | 1.415375000  | 0.784621000  | 3.583481000  |
| C  | 0.087090000  | 1.251885000  | 5.231369000  |
| C  | -1.315337000 | 1.435123000  | 5.580945000  |
| C  | -2.274315000 | 1.174007000  | 4.590490000  |
| H  | -3.337888000 | 1.279567000  | 4.803239000  |
| C  | -1.871646000 | 0.766895000  | 3.332452000  |
| H  | -2.612868000 | 0.537950000  | 2.572047000  |
| C  | 2.287649000  | 1.120364000  | 6.116726000  |
| C  | 3.324379000  | 1.764539000  | 6.829496000  |
| C  | 3.144978000  | 2.937594000  | 7.641628000  |
| C  | 4.238053000  | 3.444744000  | 8.352721000  |
| C  | 5.507435000  | 2.907897000  | 8.296230000  |
| H  | 6.336612000  | 3.334716000  | 8.856500000  |

|   |              |              |              |
|---|--------------|--------------|--------------|
| C | 5.671346000  | 1.781705000  | 7.469095000  |
| C | 4.639664000  | 1.219921000  | 6.756220000  |
| H | 4.828037000  | 0.336125000  | 6.148222000  |
| C | -3.009574000 | -0.738873000 | 0.144593000  |
| H | -2.748629000 | -1.725082000 | 0.525520000  |
| C | -4.265307000 | -0.484845000 | -0.384655000 |
| H | -5.004134000 | -1.283382000 | -0.423581000 |
| C | -4.543252000 | 0.798678000  | -0.865575000 |
| C | -3.555707000 | 1.769081000  | -0.798468000 |
| H | -3.751994000 | 2.767701000  | -1.182247000 |
| C | -2.299500000 | 1.459095000  | -0.255630000 |
| C | -1.185451000 | 2.405542000  | -0.196308000 |
| C | -1.281347000 | 3.742361000  | -0.609115000 |
| H | -2.229750000 | 4.135067000  | -0.968882000 |
| C | -0.166391000 | 4.565042000  | -0.564216000 |
| C | 1.043826000  | 4.037958000  | -0.104788000 |
| H | 1.949695000  | 4.639997000  | -0.061189000 |
| C | 1.082506000  | 2.712356000  | 0.298977000  |
| H | 2.006392000  | 2.261600000  | 0.657339000  |
| C | 1.862697000  | -0.311069000 | 1.416587000  |
| C | -0.258617000 | -2.003193000 | 1.540741000  |
| C | 0.487712000  | -0.865002000 | -0.825956000 |
| N | -1.592783000 | 1.840486000  | 6.824100000  |
| H | -2.540857000 | 1.966355000  | 7.155112000  |
| H | -0.802373000 | 1.998869000  | 7.448198000  |
| H | 2.577611000  | 0.229500000  | 5.542867000  |
| H | -5.516472000 | 1.033849000  | -1.295246000 |
| H | -0.235681000 | 5.602998000  | -0.888182000 |

|   |             |             |             |
|---|-------------|-------------|-------------|
| F | 6.902100000 | 1.236382000 | 7.396013000 |
| F | 3.994795000 | 4.547829000 | 9.113020000 |

### Complex R4

#### Ground state ( $S_0$ )

|    |              |              |              |
|----|--------------|--------------|--------------|
| Re | 0.031751000  | -0.212633000 | 0.656046000  |
| O  | 1.454720000  | 3.467380000  | 7.595243000  |
| H  | 0.937905000  | 2.873483000  | 6.967231000  |
| O  | 2.955210000  | -0.752214000 | 1.507804000  |
| O  | -0.652291000 | -3.215586000 | 0.953554000  |
| O  | 0.846019000  | -0.724239000 | -2.287344000 |
| N  | -0.567087000 | 0.170188000  | 2.790956000  |
| N  | 0.908842000  | 1.554564000  | 5.893207000  |
| N  | -1.971686000 | 0.477073000  | 0.090104000  |
| N  | 0.190990000  | 1.967170000  | 0.457448000  |
| C  | 0.292676000  | 0.741919000  | 3.668622000  |
| H  | 1.243646000  | 1.091110000  | 3.268111000  |
| C  | 0.023511000  | 0.927708000  | 5.019303000  |
| C  | -1.249075000 | 0.520099000  | 5.524396000  |
| C  | -2.133674000 | -0.073405000 | 4.604802000  |
| H  | -3.112386000 | -0.426812000 | 4.928942000  |
| C  | -1.760928000 | -0.234048000 | 3.285695000  |
| H  | -2.441913000 | -0.712149000 | 2.583864000  |
| C  | 2.186311000  | 1.286875000  | 5.868807000  |
| C  | 3.136470000  | 1.986752000  | 6.683503000  |
| C  | 2.735866000  | 3.064741000  | 7.529067000  |
| C  | 3.694789000  | 3.722758000  | 8.313224000  |
| C  | 5.022973000  | 3.326649000  | 8.271914000  |

|   |              |              |              |
|---|--------------|--------------|--------------|
| H | 5.777542000  | 3.826529000  | 8.879094000  |
| C | 5.406229000  | 2.266033000  | 7.441776000  |
| C | 4.496554000  | 1.598515000  | 6.653716000  |
| H | 4.824163000  | 0.774702000  | 6.018876000  |
| C | -3.016995000 | -0.345743000 | -0.146319000 |
| H | -2.817868000 | -1.412141000 | -0.051068000 |
| C | -4.275007000 | 0.120015000  | -0.500881000 |
| H | -5.078944000 | -0.591250000 | -0.683694000 |
| C | -4.474009000 | 1.494836000  | -0.616618000 |
| C | -3.401965000 | 2.348457000  | -0.387876000 |
| H | -3.535727000 | 3.423317000  | -0.487386000 |
| C | -2.153488000 | 1.823197000  | -0.040427000 |
| C | -0.953484000 | 2.650375000  | 0.165236000  |
| C | -0.946038000 | 4.042486000  | 0.036024000  |
| H | -1.864654000 | 4.575858000  | -0.197989000 |
| C | 0.240283000  | 4.747700000  | 0.197125000  |
| C | 1.407270000  | 4.041743000  | 0.482621000  |
| H | 2.364123000  | 4.546352000  | 0.606695000  |
| C | 1.340615000  | 2.660811000  | 0.604372000  |
| H | 2.231641000  | 2.071533000  | 0.815188000  |
| C | 1.851686000  | -0.576046000 | 1.186225000  |
| C | -0.370878000 | -2.094427000 | 0.845828000  |
| C | 0.538092000  | -0.529650000 | -1.187195000 |
| N | -1.545947000 | 0.688498000  | 6.828495000  |
| H | -2.435165000 | 0.395666000  | 7.210294000  |
| H | -0.857659000 | 1.092965000  | 7.452103000  |
| H | 2.576553000  | 0.484982000  | 5.220068000  |
| H | -5.448836000 | 1.897239000  | -0.890372000 |

|   |             |             |             |
|---|-------------|-------------|-------------|
| H | 0.254402000 | 5.832184000 | 0.093456000 |
| H | 3.372922000 | 4.543751000 | 8.953017000 |
| F | 6.708033000 | 1.894730000 | 7.420127000 |

### Complex R4

#### Triplet state ( $T_1$ )

|    |              |              |              |
|----|--------------|--------------|--------------|
| Re | 0.014003000  | -0.202908000 | 0.692417000  |
| O  | 1.458338000  | 2.955023000  | 7.923214000  |
| H  | 0.997191000  | 2.392226000  | 7.180711000  |
| O  | 2.940538000  | -0.698329000 | 1.557922000  |
| O  | -0.683339000 | -3.181232000 | 1.190781000  |
| O  | 0.819144000  | -0.910802000 | -2.212896000 |
| N  | -0.569294000 | 0.310938000  | 2.804297000  |
| N  | 0.993416000  | 1.365116000  | 5.974376000  |
| N  | -1.984700000 | 0.445238000  | 0.068600000  |
| N  | 0.175688000  | 1.958271000  | 0.391595000  |
| C  | 0.345535000  | 0.725977000  | 3.696077000  |
| H  | 1.348950000  | 0.906388000  | 3.317918000  |
| C  | 0.076982000  | 0.955995000  | 5.067206000  |
| C  | -1.283409000 | 0.753538000  | 5.513428000  |
| C  | -2.228760000 | 0.346931000  | 4.557993000  |
| H  | -3.265166000 | 0.173533000  | 4.846961000  |
| C  | -1.843677000 | 0.125927000  | 3.250019000  |
| H  | -2.566810000 | -0.224518000 | 2.517835000  |
| C  | 2.329105000  | 1.289937000  | 5.763188000  |
| C  | 3.232026000  | 1.909338000  | 6.657010000  |
| C  | 2.759111000  | 2.734434000  | 7.769636000  |
| C  | 3.662818000  | 3.316217000  | 8.680515000  |



|   |              |              |              |
|---|--------------|--------------|--------------|
| C | 5.023169000  | 3.141470000  | 8.521681000  |
| H | 5.749467000  | 3.583058000  | 9.201571000  |
| C | 5.473981000  | 2.357877000  | 7.432253000  |
| C | 4.628211000  | 1.753095000  | 6.521701000  |
| H | 5.048018000  | 1.149025000  | 5.717695000  |
| C | -3.022724000 | -0.389250000 | -0.160492000 |
| H | -2.821477000 | -1.450713000 | -0.022097000 |
| C | -4.275451000 | 0.055749000  | -0.553286000 |
| H | -5.072095000 | -0.665202000 | -0.728015000 |
| C | -4.477377000 | 1.429708000  | -0.719430000 |
| C | -3.416977000 | 2.295018000  | -0.500703000 |
| H | -3.554047000 | 3.364936000  | -0.641360000 |
| C | -2.166375000 | 1.791723000  | -0.111400000 |
| C | -0.979689000 | 2.625156000  | 0.075374000  |
| C | -0.975585000 | 4.017915000  | -0.090759000 |
| H | -1.897668000 | 4.539708000  | -0.337344000 |
| C | 0.204196000  | 4.731846000  | 0.048314000  |
| C | 1.381400000  | 4.039527000  | 0.348896000  |
| H | 2.335590000  | 4.552777000  | 0.453801000  |
| C | 1.321481000  | 2.664744000  | 0.512504000  |
| H | 2.215886000  | 2.087038000  | 0.740725000  |
| C | 1.834424000  | -0.535987000 | 1.232545000  |
| C | -0.399416000 | -2.070692000 | 1.007271000  |
| C | 0.514193000  | -0.641047000 | -1.128302000 |
| N | -1.592205000 | 0.936324000  | 6.809492000  |
| H | -2.526062000 | 0.759557000  | 7.157563000  |
| H | -0.853584000 | 1.120325000  | 7.478774000  |
| H | 2.740684000  | 0.694169000  | 4.941362000  |

|   |              |             |              |
|---|--------------|-------------|--------------|
| H | -5.448634000 | 1.817194000 | -1.025577000 |
| H | 0.211658000  | 5.813147000 | -0.084694000 |
| H | 3.256886000  | 3.913088000 | 9.496528000  |
| F | 6.798513000  | 2.192078000 | 7.291614000  |

### Complex R5

#### Ground state ( $S_0$ )

|    |              |              |              |
|----|--------------|--------------|--------------|
| Re | 0.407968000  | 1.886522000  | 1.198802000  |
| O  | 7.271387000  | 2.175985000  | -2.769326000 |
| H  | 6.681812000  | 2.305395000  | -1.962442000 |
| O  | 0.163333000  | 3.165090000  | -1.609773000 |
| O  | 0.970791000  | -0.891192000 | -0.039191000 |
| O  | -2.614835000 | 1.214361000  | 1.108991000  |
| N  | 2.603581000  | 2.355638000  | 1.257374000  |
| N  | 5.586204000  | 1.675655000  | -0.834046000 |
| N  | 0.573048000  | 1.288515000  | 3.298303000  |
| N  | -0.014695000 | 3.696767000  | 2.363450000  |
| C  | 3.414036000  | 1.896792000  | 0.267936000  |
| H  | 2.932412000  | 1.354626000  | -0.543861000 |
| C  | 4.784612000  | 2.115407000  | 0.213010000  |
| C  | 5.388039000  | 2.907198000  | 1.239759000  |
| C  | 4.540252000  | 3.382232000  | 2.256385000  |
| H  | 4.939898000  | 3.983909000  | 3.072594000  |
| C  | 3.191002000  | 3.085676000  | 2.232942000  |
| H  | 2.544246000  | 3.457233000  | 3.025437000  |
| C  | 5.411674000  | 0.498131000  | -1.378625000 |
| C  | 6.127063000  | 0.061683000  | -2.537137000 |
| C  | 7.042680000  | 0.923548000  | -3.206570000 |

|   |              |              |              |
|---|--------------|--------------|--------------|
| C | 7.731328000  | 0.475870000  | -4.353363000 |
| C | 7.486699000  | -0.821116000 | -4.791458000 |
| H | 8.020506000  | -1.169175000 | -5.679703000 |
| C | 6.588565000  | -1.708354000 | -4.155253000 |
| C | 5.920246000  | -1.248983000 | -3.034942000 |
| H | 5.214061000  | -1.899106000 | -2.513059000 |
| C | 0.920892000  | 0.048028000  | 3.706206000  |
| H | 1.168859000  | -0.663402000 | 2.920920000  |
| C | 0.950750000  | -0.319728000 | 5.040610000  |
| H | 1.226944000  | -1.330197000 | 5.338874000  |
| C | 0.608146000  | 0.622536000  | 6.013576000  |
| C | 0.260073000  | 1.907716000  | 5.602559000  |
| H | -0.004612000 | 2.652916000  | 6.348687000  |
| C | 0.250309000  | 2.221006000  | 4.241429000  |
| C | -0.105959000 | 3.550588000  | 3.719786000  |
| C | -0.527977000 | 4.604459000  | 4.528094000  |
| H | -0.627713000 | 4.498417000  | 5.606940000  |
| C | -0.857758000 | 5.832645000  | 3.959221000  |
| C | -0.735591000 | 5.981935000  | 2.575221000  |
| H | -0.977268000 | 6.924546000  | 2.088732000  |
| C | -0.313331000 | 4.897402000  | 1.820414000  |
| H | -0.220167000 | 4.970055000  | 0.738321000  |
| C | 0.259689000  | 2.664989000  | -0.566522000 |
| C | 0.762815000  | 0.162596000  | 0.406024000  |
| C | -1.484525000 | 1.467035000  | 1.146500000  |
| C | 6.382424000  | -3.097086000 | -4.696887000 |
| H | 7.325404000  | -3.662880000 | -4.708664000 |
| H | 5.658971000  | -3.659166000 | -4.093760000 |

|   |              |              |              |
|---|--------------|--------------|--------------|
| H | 6.010905000  | -3.068779000 | -5.731627000 |
| C | 8.687545000  | 1.396620000  | -5.053883000 |
| H | 8.180593000  | 2.314394000  | -5.385071000 |
| H | 9.497438000  | 1.714417000  | -4.381622000 |
| H | 9.131924000  | 0.907658000  | -5.928394000 |
| N | 6.714104000  | 3.148711000  | 1.209809000  |
| H | 7.160874000  | 3.738651000  | 1.898250000  |
| H | 7.268079000  | 2.784331000  | 0.443452000  |
| H | 4.696283000  | -0.216044000 | -0.937210000 |
| C | 0.621765000  | 0.188518000  | 7.455382000  |
| O | 0.925207000  | -0.938710000 | 7.789366000  |
| O | 0.263209000  | 1.189964000  | 8.277936000  |
| C | -1.350939000 | 6.916983000  | 4.880091000  |
| O | -1.457839000 | 6.750901000  | 6.079846000  |
| O | -1.645470000 | 8.038427000  | 4.204584000  |
| C | -2.198548000 | 9.149312000  | 4.992658000  |
| H | -1.743733000 | 9.119651000  | 5.989512000  |
| H | -1.861806000 | 10.041766000 | 4.453671000  |
| C | 0.200172000  | 0.859459000  | 9.709322000  |
| H | 0.994263000  | 0.135128000  | 9.925360000  |
| H | 0.418372000  | 1.812237000  | 10.204276000 |
| C | -3.708814000 | 9.058593000  | 5.055123000  |
| H | -4.147584000 | 9.050571000  | 4.049384000  |
| H | -4.030096000 | 8.160749000  | 5.597325000  |
| H | -4.099045000 | 9.934954000  | 5.590251000  |
| C | -1.167836000 | 0.325653000  | 10.078702000 |
| H | -1.956974000 | 1.043597000  | 9.821737000  |
| H | -1.369122000 | -0.629073000 | 9.577762000  |

|   |              |             |              |
|---|--------------|-------------|--------------|
| H | -1.204239000 | 0.153114000 | 11.162943000 |
|---|--------------|-------------|--------------|

**Complex R5**

**Triplet state ( $T_1$ )**

|    |              |              |              |
|----|--------------|--------------|--------------|
| Re | 0.397588000  | 1.805044000  | 1.273992000  |
| O  | 7.450635000  | 1.946825000  | -2.420241000 |
| H  | 6.766794000  | 2.009991000  | -1.637214000 |
| O  | 0.107900000  | 2.962306000  | -1.589491000 |
| O  | 0.969085000  | -0.982494000 | 0.055462000  |
| O  | -2.629315000 | 1.133572000  | 1.270276000  |
| N  | 2.591853000  | 2.257570000  | 1.275527000  |
| N  | 5.566695000  | 1.472394000  | -0.764841000 |
| N  | 0.615223000  | 1.267950000  | 3.375140000  |
| N  | 0.000453000  | 3.647433000  | 2.384768000  |
| C  | 3.380295000  | 1.778827000  | 0.294447000  |
| H  | 2.879740000  | 1.237608000  | -0.505396000 |
| C  | 4.770988000  | 1.968148000  | 0.229216000  |
| C  | 5.378727000  | 2.772875000  | 1.258871000  |
| C  | 4.536926000  | 3.284499000  | 2.263583000  |
| H  | 4.947453000  | 3.894731000  | 3.067800000  |
| C  | 3.188179000  | 2.994609000  | 2.252936000  |
| H  | 2.540653000  | 3.368780000  | 3.042218000  |
| C  | 5.209743000  | 0.433216000  | -1.528299000 |
| C  | 5.978602000  | 0.058712000  | -2.664348000 |
| C  | 7.126424000  | 0.844325000  | -3.083215000 |
| C  | 7.919027000  | 0.462896000  | -4.202709000 |
| C  | 7.548083000  | -0.676770000 | -4.894190000 |
| H  | 8.139471000  | -0.984255000 | -5.758591000 |

|   |              |              |              |
|---|--------------|--------------|--------------|
| C | 6.424849000  | -1.468126000 | -4.520906000 |
| C | 5.661736000  | -1.085262000 | -3.417441000 |
| H | 4.802652000  | -1.689769000 | -3.120671000 |
| C | 0.973216000  | 0.036561000  | 3.820909000  |
| H | 1.225234000  | -0.693108000 | 3.053434000  |
| C | 1.011239000  | -0.296892000 | 5.157193000  |
| H | 1.297704000  | -1.296347000 | 5.479584000  |
| C | 0.659140000  | 0.673414000  | 6.115248000  |
| C | 0.292728000  | 1.939022000  | 5.671251000  |
| H | 0.017944000  | 2.699382000  | 6.398384000  |
| C | 0.273871000  | 2.227482000  | 4.301878000  |
| C | -0.089445000 | 3.528127000  | 3.754980000  |
| C | -0.520897000 | 4.604588000  | 4.533758000  |
| H | -0.626149000 | 4.519044000  | 5.614012000  |
| C | -0.853563000 | 5.816854000  | 3.940992000  |
| C | -0.721767000 | 5.939212000  | 2.544457000  |
| H | -0.962964000 | 6.870605000  | 2.037854000  |
| C | -0.300255000 | 4.841885000  | 1.818632000  |
| H | -0.208238000 | 4.891652000  | 0.734862000  |
| C | 0.219001000  | 2.516144000  | -0.522298000 |
| C | 0.748390000  | 0.069074000  | 0.503909000  |
| C | -1.499997000 | 1.386431000  | 1.280532000  |
| C | 6.091277000  | -2.692468000 | -5.311934000 |
| H | 6.939426000  | -3.394848000 | -5.317611000 |
| H | 5.211638000  | -3.212896000 | -4.917261000 |
| H | 5.900322000  | -2.433617000 | -6.365246000 |
| C | 9.095388000  | 1.303788000  | -4.590772000 |
| H | 8.781983000  | 2.327043000  | -4.844259000 |

|   |              |              |              |
|---|--------------|--------------|--------------|
| H | 9.806374000  | 1.396201000  | -3.756982000 |
| H | 9.617367000  | 0.873771000  | -5.452520000 |
| N | 6.705818000  | 2.991186000  | 1.245921000  |
| H | 7.156696000  | 3.539928000  | 1.966854000  |
| H | 7.284819000  | 2.534953000  | 0.550808000  |
| H | 4.340028000  | -0.184848000 | -1.273454000 |
| C | 0.682551000  | 0.281587000  | 7.558883000  |
| O | 0.998652000  | -0.832814000 | 7.931526000  |
| O | 0.315764000  | 1.302189000  | 8.363725000  |
| C | -1.362605000 | 6.909732000  | 4.828506000  |
| O | -1.480561000 | 6.783677000  | 6.033931000  |
| O | -1.670703000 | 8.016202000  | 4.121757000  |
| C | -2.255191000 | 9.126762000  | 4.877862000  |
| H | -1.820712000 | 9.124718000  | 5.884429000  |
| H | -1.927057000 | 10.018406000 | 4.331408000  |
| C | 0.250992000  | 1.001657000  | 9.796277000  |
| H | 1.040439000  | 0.277827000  | 10.031147000 |
| H | 0.471224000  | 1.962169000  | 10.276098000 |
| C | -3.765552000 | 9.011010000  | 4.915895000  |
| H | -4.185239000 | 8.975480000  | 3.902457000  |
| H | -4.078889000 | 8.115699000  | 5.466985000  |
| H | -4.183285000 | 9.888433000  | 5.428172000  |
| C | -1.120307000 | 0.480787000  | 10.176094000 |
| H | -1.905635000 | 1.196273000  | 9.900729000  |
| H | -1.323918000 | -0.482343000 | 9.692253000  |
| H | -1.161777000 | 0.330063000  | 11.263520000 |

### Complex R6

#### Ground state ( $S_0$ )

|    |              |              |              |
|----|--------------|--------------|--------------|
| Re | 0.230218000  | -0.148325000 | -0.069756000 |
| O  | 6.812471000  | -3.300736000 | 3.016574000  |
| H  | 6.316247000  | -2.700167000 | 2.378796000  |
| O  | 0.166587000  | -0.240892000 | 3.021131000  |
| O  | 0.331176000  | 2.944859000  | -0.000533000 |
| O  | -2.864771000 | -0.022931000 | -0.035525000 |
| N  | 2.474716000  | -0.251460000 | -0.089240000 |
| N  | 5.193955000  | -1.445563000 | 2.122557000  |
| N  | 0.220729000  | -0.378491000 | -2.249627000 |
| N  | 0.298496000  | -2.307881000 | -0.429925000 |
| C  | 3.147650000  | -0.795316000 | 0.955298000  |
| H  | 2.549325000  | -1.246888000 | 1.744851000  |
| C  | 4.532232000  | -0.834975000 | 1.062073000  |
| C  | 5.311927000  | -0.297174000 | -0.007779000 |
| C  | 4.605091000  | 0.266510000  | -1.086094000 |
| H  | 5.140509000  | 0.711080000  | -1.924945000 |
| C  | 3.224092000  | 0.277015000  | -1.085146000 |
| H  | 2.683182000  | 0.727989000  | -1.915213000 |
| C  | 4.791527000  | -1.286748000 | 3.356958000  |
| C  | 5.359387000  | -2.007553000 | 4.455159000  |
| C  | 6.358068000  | -3.004040000 | 4.246303000  |
| C  | 6.875300000  | -3.693225000 | 5.351046000  |
| C  | 6.420862000  | -3.397782000 | 6.626166000  |
| H  | 6.840375000  | -3.946054000 | 7.472337000  |
| C  | 5.435095000  | -2.414134000 | 6.871283000  |



|   |              |              |              |
|---|--------------|--------------|--------------|
| C | 4.922076000  | -1.739455000 | 5.775862000  |
| H | 4.156806000  | -0.972800000 | 5.920238000  |
| C | 0.096087000  | 0.646859000  | -3.122183000 |
| H | 0.082618000  | 1.645486000  | -2.688388000 |
| C | -0.028630000 | 0.462350000  | -4.490890000 |
| H | -0.138972000 | 1.320758000  | -5.150057000 |
| C | -0.023315000 | -0.840142000 | -4.997614000 |
| C | 0.115707000  | -1.900276000 | -4.105279000 |
| H | 0.107218000  | -2.911156000 | -4.508860000 |
| C | 0.233888000  | -1.653942000 | -2.738092000 |
| C | 0.324048000  | -2.721620000 | -1.730092000 |
| C | 0.399993000  | -4.077232000 | -2.057261000 |
| H | 0.421612000  | -4.399955000 | -3.095199000 |
| C | 0.446895000  | -5.032867000 | -1.044493000 |
| C | 0.413900000  | -4.599588000 | 0.283110000  |
| H | 0.443301000  | -5.328341000 | 1.092030000  |
| C | 0.339018000  | -3.241852000 | 0.545857000  |
| H | 0.296176000  | -2.869955000 | 1.568011000  |
| C | 0.196540000  | -0.185205000 | 1.859983000  |
| C | 0.289096000  | 1.785142000  | -0.003002000 |
| C | -1.707387000 | -0.074157000 | -0.050786000 |
| C | 4.979185000  | -2.125419000 | 8.275777000  |
| H | 5.810834000  | -1.756484000 | 8.893754000  |
| H | 4.185472000  | -1.368751000 | 8.293032000  |
| H | 4.594305000  | -3.032809000 | 8.763078000  |
| N | 6.657982000  | -0.329149000 | 0.059764000  |
| H | 7.235251000  | 0.044706000  | -0.681074000 |
| H | 7.106974000  | -0.731285000 | 0.874352000  |

|   |              |              |               |
|---|--------------|--------------|---------------|
| H | 3.989596000  | -0.566316000 | 3.590968000   |
| H | 7.636026000  | -4.455187000 | 5.182417000   |
| C | -0.185868000 | -1.171752000 | -6.457220000  |
| O | -0.190837000 | -2.316174000 | -6.867043000  |
| O | -0.319092000 | -0.061272000 | -7.199373000  |
| C | 0.525672000  | -6.513286000 | -1.307933000  |
| O | 0.605437000  | -7.328217000 | -0.411381000  |
| O | 0.487439000  | -6.782653000 | -2.624582000  |
| C | 0.556191000  | -8.201103000 | -3.002075000  |
| H | 0.069546000  | -8.786410000 | -2.213298000  |
| H | -0.034537000 | -8.252310000 | -3.923561000  |
| C | -0.521513000 | -0.255675000 | -8.642093000  |
| H | -0.038901000 | 0.619338000  | -9.091730000  |
| H | 0.006631000  | -1.168838000 | -8.940248000  |
| C | 1.990715000  | -8.632144000 | -3.222652000  |
| H | 2.478606000  | -8.012711000 | -3.986030000  |
| H | 2.567926000  | -8.581525000 | -2.291251000  |
| H | 2.001722000  | -9.673686000 | -3.571769000  |
| C | -1.998328000 | -0.321261000 | -8.970374000  |
| H | -2.467615000 | -1.201965000 | -8.514876000  |
| H | -2.520921000 | 0.582455000  | -8.632162000  |
| H | -2.120101000 | -0.397492000 | -10.059433000 |

### Complex R6

#### Triplet state ( $T_1$ )

|    |             |              |              |
|----|-------------|--------------|--------------|
| Re | 0.187956000 | -0.094619000 | -0.068579000 |
| O  | 7.167992000 | -2.567933000 | 2.960961000  |
| H  | 6.524113000 | -1.999114000 | 2.390026000  |

|   |              |              |              |
|---|--------------|--------------|--------------|
| O | 0.148838000  | -0.161792000 | 3.023220000  |
| O | 0.262454000  | 3.008390000  | -0.035687000 |
| O | -2.908334000 | 0.025631000  | -0.041090000 |
| N | 2.433022000  | -0.163917000 | -0.064684000 |
| N | 5.196921000  | -1.100863000 | 2.191865000  |
| N | 0.212798000  | -0.344605000 | -2.242693000 |
| N | 0.260400000  | -2.247962000 | -0.385625000 |
| C | 3.108483000  | -0.651612000 | 0.988307000  |
| H | 2.518728000  | -1.130384000 | 1.766799000  |
| C | 4.511784000  | -0.604173000 | 1.127324000  |
| C | 5.262585000  | -0.021618000 | 0.040749000  |
| C | 4.539202000  | 0.450971000  | -1.069733000 |
| H | 5.059587000  | 0.898591000  | -1.916249000 |
| C | 3.162013000  | 0.382120000  | -1.080003000 |
| H | 2.596317000  | 0.774250000  | -1.922054000 |
| C | 4.626642000  | -1.315392000 | 3.389745000  |
| C | 5.304561000  | -2.036168000 | 4.405074000  |
| C | 6.601649000  | -2.649725000 | 4.160326000  |
| C | 7.265874000  | -3.344679000 | 5.188726000  |
| C | 6.677307000  | -3.463150000 | 6.429417000  |
| H | 7.191002000  | -4.009399000 | 7.221232000  |
| C | 5.401845000  | -2.880435000 | 6.705816000  |
| C | 4.748281000  | -2.185261000 | 5.694094000  |
| H | 3.777227000  | -1.729582000 | 5.897478000  |
| C | 0.102647000  | 0.663426000  | -3.142083000 |
| H | 0.061986000  | 1.669685000  | -2.726983000 |
| C | 0.026088000  | 0.458106000  | -4.506657000 |
| H | -0.073995000 | 1.303741000  | -5.182808000 |

|   |              |              |              |
|---|--------------|--------------|--------------|
| C | 0.062109000  | -0.861883000 | -4.993372000 |
| C | 0.180505000  | -1.901429000 | -4.079460000 |
| H | 0.194183000  | -2.919117000 | -4.465641000 |
| C | 0.250755000  | -1.638426000 | -2.708429000 |
| C | 0.304578000  | -2.680879000 | -1.690548000 |
| C | 0.362330000  | -4.047537000 | -1.989490000 |
| H | 0.398282000  | -4.384903000 | -3.022422000 |
| C | 0.370052000  | -4.988800000 | -0.967241000 |
| C | 0.309634000  | -4.533750000 | 0.363175000  |
| H | 0.302490000  | -5.251265000 | 1.181624000  |
| C | 0.253978000  | -3.177090000 | 0.602889000  |
| H | 0.190022000  | -2.790538000 | 1.618759000  |
| C | 0.160331000  | -0.115541000 | 1.859384000  |
| C | 0.233683000  | 1.848171000  | -0.029400000 |
| C | -1.752046000 | -0.023951000 | -0.056869000 |
| C | 4.808021000  | -3.024023000 | 8.070178000  |
| H | 5.481796000  | -2.604992000 | 8.833843000  |
| H | 3.836292000  | -2.524725000 | 8.152590000  |
| H | 4.677468000  | -4.087239000 | 8.326284000  |
| N | 6.600451000  | 0.070523000  | 0.127864000  |
| H | 7.148540000  | 0.500264000  | -0.606758000 |
| H | 7.067661000  | -0.205359000 | 0.984209000  |
| H | 3.640626000  | -0.897684000 | 3.627517000  |
| H | 8.237050000  | -3.787230000 | 4.968309000  |
| C | -0.050436000 | -1.218978000 | -6.444231000 |
| O | -0.032837000 | -2.368083000 | -6.845544000 |
| O | -0.171241000 | -0.119355000 | -7.214061000 |
| C | 0.434484000  | -6.465139000 | -1.209670000 |

|   |              |              |               |
|---|--------------|--------------|---------------|
| O | 0.507114000  | -7.275479000 | -0.305075000  |
| O | 0.394732000  | -6.759016000 | -2.525939000  |
| C | 0.450923000  | -8.180512000 | -2.875779000  |
| H | -0.033484000 | -8.749987000 | -2.073927000  |
| H | -0.144995000 | -8.248295000 | -3.793160000  |
| C | -0.335300000 | -0.345340000 | -8.652898000  |
| H | 0.148147000  | 0.524627000  | -9.112103000  |
| H | 0.207811000  | -1.259103000 | -8.921644000  |
| C | 1.881227000  | -8.627598000 | -3.097678000  |
| H | 2.368872000  | -8.024299000 | -3.874178000  |
| H | 2.463706000  | -8.562520000 | -2.170311000  |
| H | 1.884568000  | -9.675368000 | -3.427996000  |
| C | -1.803227000 | -0.434281000 | -9.017243000  |
| H | -2.272902000 | -1.310764000 | -8.553961000  |
| H | -2.343478000 | 0.469597000  | -8.708048000  |
| H | -1.899485000 | -0.533540000 | -10.107069000 |

### Complex R7

#### Ground state ( $S_0$ )

|    |              |              |              |
|----|--------------|--------------|--------------|
| Re | -0.416278000 | 0.211436000  | 2.128369000  |
| O  | 3.187809000  | 3.091140000  | -4.674202000 |
| H  | 3.857397000  | 3.207515000  | -5.385617000 |
| O  | 2.665720000  | 0.421517000  | 2.317485000  |
| O  | -0.703726000 | 3.290798000  | 2.104510000  |
| O  | -0.546827000 | 0.294105000  | 5.222197000  |
| N  | -0.293015000 | 0.177175000  | -0.115173000 |
| N  | 1.316785000  | 2.168757000  | -2.807593000 |
| N  | -2.553038000 | -0.254707000 | 1.987367000  |

|   |              |              |              |
|---|--------------|--------------|--------------|
| N | -0.550083000 | -1.979332000 | 2.160608000  |
| C | 0.403984000  | 1.150516000  | -0.760235000 |
| H | 0.897178000  | 1.890572000  | -0.132588000 |
| C | 0.559290000  | 1.216603000  | -2.138656000 |
| C | -0.004613000 | 0.171252000  | -2.937957000 |
| C | -0.739823000 | -0.821155000 | -2.264321000 |
| H | -1.210592000 | -1.634371000 | -2.816499000 |
| C | -0.862031000 | -0.777198000 | -0.888399000 |
| H | -1.429353000 | -1.550277000 | -0.372731000 |
| C | 1.334139000  | 3.397063000  | -2.416858000 |
| C | 2.143529000  | 4.458323000  | -2.992637000 |
| C | 3.039612000  | 4.292045000  | -4.080494000 |
| C | 3.763770000  | 5.415686000  | -4.524214000 |
| C | 3.628506000  | 6.667408000  | -3.940249000 |
| H | 4.205645000  | 7.512629000  | -4.311289000 |
| C | 2.739749000  | 6.820469000  | -2.872132000 |
| C | 2.010535000  | 5.735972000  | -2.409544000 |
| H | 1.321088000  | 5.867144000  | -1.575607000 |
| C | -3.524340000 | 0.677370000  | 1.867478000  |
| H | -3.189846000 | 1.704719000  | 1.736812000  |
| C | -4.872231000 | 0.366098000  | 1.927766000  |
| H | -5.632657000 | 1.140934000  | 1.839997000  |
| C | -5.254810000 | -0.963341000 | 2.123057000  |
| C | -4.260256000 | -1.934555000 | 2.220971000  |
| H | -4.543368000 | -2.974053000 | 2.366694000  |
| C | -2.916431000 | -1.561093000 | 2.144754000  |
| C | -1.803368000 | -2.519237000 | 2.242090000  |
| C | -1.985071000 | -3.890278000 | 2.415491000  |

|   |              |              |              |
|---|--------------|--------------|--------------|
| H | -2.975739000 | -4.334473000 | 2.493360000  |
| C | -0.881592000 | -4.735247000 | 2.507676000  |
| C | 0.395614000  | -4.178218000 | 2.401834000  |
| H | 1.285879000  | -4.800686000 | 2.462368000  |
| C | 0.515535000  | -2.806808000 | 2.228875000  |
| H | 1.493723000  | -2.335279000 | 2.154752000  |
| C | 1.508042000  | 0.365881000  | 2.245916000  |
| C | -0.571739000 | 2.135669000  | 2.112483000  |
| C | -0.504604000 | 0.259987000  | 4.064565000  |
| N | 0.176745000  | 0.207413000  | -4.272120000 |
| H | -0.106157000 | -0.561387000 | -4.864844000 |
| H | 0.818905000  | 0.908887000  | -4.634076000 |
| H | 0.686205000  | 3.734624000  | -1.585946000 |
| C | -6.725133000 | -1.269224000 | 2.230343000  |
| O | -7.575075000 | -0.407709000 | 2.131091000  |
| O | -6.945373000 | -2.578748000 | 2.443204000  |
| C | -1.143799000 | -6.201799000 | 2.725394000  |
| O | -2.268959000 | -6.658167000 | 2.788509000  |
| O | 0.000507000  | -6.894928000 | 2.832936000  |
| C | -0.130846000 | -8.340060000 | 3.068093000  |
| H | -1.034292000 | -8.687058000 | 2.553073000  |
| H | 0.758997000  | -8.761280000 | 2.587166000  |
| C | -8.351254000 | -2.981543000 | 2.592474000  |
| H | -8.955903000 | -2.356565000 | 1.924671000  |
| H | -8.360177000 | -4.019721000 | 2.242119000  |
| C | -0.172575000 | -8.643548000 | 4.551008000  |
| H | 0.718435000  | -8.256192000 | 5.061064000  |
| H | -1.069866000 | -8.219906000 | 5.018375000  |

|    |              |              |              |
|----|--------------|--------------|--------------|
| H  | -0.199103000 | -9.732630000 | 4.692154000  |
| C  | -8.798942000 | -2.863565000 | 4.034251000  |
| H  | -8.162148000 | -3.462066000 | 4.698014000  |
| H  | -8.790145000 | -1.818905000 | 4.368216000  |
| H  | -9.828010000 | -3.237996000 | 4.121058000  |
| Cl | 2.557322000  | 8.382250000  | -2.128775000 |
| Cl | 4.861242000  | 5.185030000  | -5.862246000 |

### Complex R7

#### Triplet state ( $T_1$ )

|    |              |              |              |
|----|--------------|--------------|--------------|
| Re | -0.347816000 | 0.174790000  | 2.085581000  |
| O  | 3.079888000  | 3.060023000  | -4.493534000 |
| H  | 3.742579000  | 3.125607000  | -5.221009000 |
| O  | 2.740361000  | 0.411278000  | 2.213840000  |
| O  | -0.591010000 | 3.258968000  | 2.072622000  |
| O  | -0.430162000 | 0.221553000  | 5.182018000  |
| N  | -0.259454000 | 0.172696000  | -0.161122000 |
| N  | 0.923155000  | 2.323619000  | -2.902912000 |
| N  | -2.479932000 | -0.276052000 | 1.938570000  |
| N  | -0.487299000 | -2.013309000 | 2.120125000  |
| C  | 0.329442000  | 1.187898000  | -0.809770000 |
| H  | 0.785067000  | 1.965535000  | -0.199893000 |
| C  | 0.393545000  | 1.300227000  | -2.222529000 |
| C  | -0.132235000 | 0.187539000  | -2.996596000 |
| C  | -0.742844000 | -0.867178000 | -2.295162000 |
| H  | -1.171880000 | -1.714696000 | -2.829202000 |
| C  | -0.802588000 | -0.831512000 | -0.916646000 |
| H  | -1.283373000 | -1.638164000 | -0.368378000 |



|   |              |              |              |
|---|--------------|--------------|--------------|
| C | 1.140777000  | 3.532649000  | -2.375544000 |
| C | 2.023655000  | 4.515030000  | -2.892822000 |
| C | 2.954579000  | 4.290247000  | -3.968609000 |
| C | 3.732684000  | 5.363637000  | -4.440946000 |
| C | 3.666139000  | 6.629418000  | -3.880612000 |
| H | 4.284445000  | 7.440970000  | -4.257958000 |
| C | 2.779734000  | 6.834988000  | -2.801357000 |
| C | 1.987212000  | 5.813297000  | -2.318005000 |
| H | 1.301944000  | 6.006194000  | -1.493444000 |
| C | -3.452999000 | 0.660800000  | 1.816884000  |
| H | -3.113979000 | 1.687158000  | 1.688500000  |
| C | -4.797885000 | 0.357899000  | 1.868194000  |
| H | -5.553738000 | 1.135956000  | 1.775484000  |
| C | -5.190531000 | -0.977390000 | 2.062393000  |
| C | -4.201219000 | -1.949323000 | 2.172742000  |
| H | -4.489474000 | -2.987156000 | 2.321239000  |
| C | -2.851410000 | -1.588196000 | 2.105746000  |
| C | -1.752401000 | -2.544727000 | 2.212968000  |
| C | -1.936217000 | -3.914974000 | 2.408589000  |
| H | -2.930030000 | -4.350651000 | 2.495384000  |
| C | -0.840867000 | -4.764922000 | 2.515139000  |
| C | 0.447011000  | -4.214880000 | 2.398955000  |
| H | 1.333081000  | -4.841260000 | 2.471867000  |
| C | 0.573294000  | -2.851300000 | 2.202964000  |
| H | 1.555056000  | -2.387707000 | 2.122376000  |
| C | 1.581917000  | 0.338902000  | 2.168080000  |
| C | -0.482738000 | 2.100215000  | 2.083173000  |
| C | -0.407478000 | 0.198846000  | 4.024927000  |

|    |              |              |              |
|----|--------------|--------------|--------------|
| N  | -0.009273000 | 0.241359000  | -4.326977000 |
| H  | -0.352081000 | -0.493145000 | -4.933410000 |
| H  | 0.466862000  | 1.052502000  | -4.719499000 |
| H  | 0.532438000  | 3.856714000  | -1.517920000 |
| C  | -6.655938000 | -1.276383000 | 2.155567000  |
| O  | -7.507251000 | -0.415050000 | 2.043669000  |
| O  | -6.888954000 | -2.587170000 | 2.372711000  |
| C  | -1.110620000 | -6.219520000 | 2.759942000  |
| O  | -2.235050000 | -6.684045000 | 2.796205000  |
| O  | 0.031697000  | -6.911936000 | 2.930459000  |
| C  | -0.115111000 | -8.343938000 | 3.212927000  |
| H  | -0.976524000 | -8.717377000 | 2.646400000  |
| H  | 0.808873000  | -8.781866000 | 2.818919000  |
| C  | -8.296352000 | -2.975285000 | 2.511503000  |
| H  | -8.891345000 | -2.350890000 | 1.834269000  |
| H  | -8.313635000 | -4.016560000 | 2.170005000  |
| C  | -0.269603000 | -8.591804000 | 4.699358000  |
| H  | 0.578560000  | -8.178844000 | 5.260146000  |
| H  | -1.200974000 | -8.154343000 | 5.078623000  |
| H  | -0.304026000 | -9.674587000 | 4.881555000  |
| C  | -8.758115000 | -2.842271000 | 3.948210000  |
| H  | -8.131457000 | -3.439635000 | 4.622658000  |
| H  | -8.742425000 | -1.794730000 | 4.272886000  |
| H  | -9.791051000 | -3.207298000 | 4.029703000  |
| Cl | 2.688103000  | 8.414161000  | -2.095077000 |
| Cl | 4.825944000  | 5.033086000  | -5.759456000 |

### Complex R8

#### Ground state ( $S_0$ )

|    |              |              |              |
|----|--------------|--------------|--------------|
| Re | 0.346419000  | -0.203808000 | 2.297524000  |
| O  | 2.934870000  | 2.852058000  | -4.614179000 |
| H  | 2.364737000  | 2.251979000  | -4.039483000 |
| O  | 3.429327000  | -0.421687000 | 2.109653000  |
| O  | 0.495651000  | 2.882426000  | 2.409245000  |
| O  | 0.564102000  | -0.224937000 | 5.386991000  |
| N  | 0.179503000  | -0.150199000 | 0.053190000  |
| N  | 1.343341000  | 2.049194000  | -2.693539000 |
| N  | -1.836149000 | -0.362575000 | 2.304483000  |
| N  | -0.088456000 | -2.354665000 | 2.320645000  |
| C  | 0.781769000  | 0.851927000  | -0.635943000 |
| H  | 1.404341000  | 1.532077000  | -0.057870000 |
| C  | 0.685332000  | 1.029668000  | -2.010442000 |
| C  | -0.055534000 | 0.071045000  | -2.769381000 |
| C  | -0.658772000 | -0.976597000 | -2.048668000 |
| H  | -1.239241000 | -1.739647000 | -2.567041000 |
| C  | -0.528918000 | -1.043914000 | -0.675252000 |
| H  | -1.004277000 | -1.855783000 | -0.127885000 |
| C  | 1.469523000  | 3.241027000  | -2.173355000 |
| C  | 2.251170000  | 4.275152000  | -2.785308000 |
| C  | 2.967131000  | 4.043745000  | -3.997722000 |
| C  | 3.722350000  | 5.082463000  | -4.559852000 |
| C  | 3.779001000  | 6.320290000  | -3.939569000 |
| H  | 4.369508000  | 7.124701000  | -4.377280000 |
| C  | 3.080970000  | 6.552258000  | -2.740636000 |

|   |              |              |              |
|---|--------------|--------------|--------------|
| C | 2.323716000  | 5.547094000  | -2.171053000 |
| H | 1.782626000  | 5.727743000  | -1.241686000 |
| C | -2.671267000 | 0.696704000  | 2.223507000  |
| H | -2.200727000 | 1.676321000  | 2.167843000  |
| C | -4.049324000 | 0.563766000  | 2.217345000  |
| H | -4.698515000 | 1.435602000  | 2.148908000  |
| C | -4.609491000 | -0.712940000 | 2.305279000  |
| C | -3.755712000 | -1.810898000 | 2.392504000  |
| H | -4.177133000 | -2.811045000 | 2.457714000  |
| C | -2.372826000 | -1.614658000 | 2.387556000  |
| C | -1.399367000 | -2.716785000 | 2.458895000  |
| C | -1.758642000 | -4.046602000 | 2.670384000  |
| H | -2.796118000 | -4.348002000 | 2.804668000  |
| C | -0.776945000 | -5.032839000 | 2.739156000  |
| C | 0.558635000  | -4.657800000 | 2.571416000  |
| H | 1.357922000  | -5.394812000 | 2.611782000  |
| C | 0.856968000  | -3.318964000 | 2.364871000  |
| H | 1.886232000  | -2.986130000 | 2.243584000  |
| C | 2.275589000  | -0.318411000 | 2.184754000  |
| C | 0.464144000  | 1.720824000  | 2.362119000  |
| C | 0.477456000  | -0.221002000 | 4.231665000  |
| N | -0.165282000 | 0.202991000  | -4.106535000 |
| H | -0.649003000 | -0.485045000 | -4.667524000 |
| H | 0.294101000  | 0.975980000  | -4.573593000 |
| H | 0.959337000  | 3.497306000  | -1.230112000 |
| C | -6.110416000 | -0.828069000 | 2.298131000  |
| O | -6.833552000 | 0.139578000  | 2.174783000  |
| O | -6.511238000 | -2.103469000 | 2.439076000  |

|    |              |               |              |
|----|--------------|---------------|--------------|
| C  | -1.224348000 | -6.446182000  | 3.004874000  |
| O  | -2.396631000 | -6.743500000  | 3.129534000  |
| O  | -0.179546000 | -7.284540000  | 3.079767000  |
| C  | -0.487501000 | -8.693017000  | 3.368534000  |
| H  | -1.451385000 | -8.931983000  | 2.904231000  |
| H  | 0.316603000  | -9.240661000  | 2.864670000  |
| C  | -7.965085000 | -2.319912000  | 2.481893000  |
| H  | -8.432953000 | -1.613974000  | 1.785576000  |
| H  | -8.083256000 | -3.344307000  | 2.111767000  |
| C  | -0.498805000 | -8.947037000  | 4.861217000  |
| H  | 0.458476000  | -8.667512000  | 5.319089000  |
| H  | -1.309534000 | -8.394953000  | 5.352162000  |
| H  | -0.661580000 | -10.018510000 | 5.040323000  |
| C  | -8.496665000 | -2.158401000  | 3.890686000  |
| H  | -7.993982000 | -2.843053000  | 4.585551000  |
| H  | -8.374535000 | -1.127627000  | 4.244831000  |
| H  | -9.569572000 | -2.393544000  | 3.897457000  |
| Cl | 3.182019000  | 8.115194000   | -1.978848000 |
| H  | 4.262699000  | 4.894600000   | -5.487265000 |

### Complex R8

#### Triplet state ( $T_1$ )

|    |             |              |              |
|----|-------------|--------------|--------------|
| Re | 0.440323000 | -0.273767000 | 2.351620000  |
| O  | 2.486086000 | 2.997322000  | -4.665248000 |
| H  | 1.977516000 | 2.396543000  | -3.989120000 |
| O  | 3.532426000 | -0.510794000 | 2.271374000  |
| O  | 0.672798000 | 2.806428000  | 2.497562000  |
| O  | 0.538209000 | -0.327873000 | 5.448082000  |

|   |              |              |              |
|---|--------------|--------------|--------------|
| N | 0.347262000  | -0.199207000 | 0.105389000  |
| N | 1.192896000  | 2.134821000  | -2.628379000 |
| N | -1.737124000 | -0.389034000 | 2.276557000  |
| N | -0.033822000 | -2.415674000 | 2.352960000  |
| C | 0.798453000  | 0.880346000  | -0.559498000 |
| H | 1.267886000  | 1.655968000  | 0.040095000  |
| C | 0.737592000  | 1.040703000  | -1.958598000 |
| C | 0.184166000  | -0.050969000 | -2.724115000 |
| C | -0.255476000 | -1.183190000 | -2.014641000 |
| H | -0.677076000 | -2.036137000 | -2.546214000 |
| C | -0.177991000 | -1.213930000 | -0.637342000 |
| H | -0.534807000 | -2.081347000 | -0.087706000 |
| C | 1.421077000  | 3.316972000  | -2.030819000 |
| C | 2.071948000  | 4.369233000  | -2.725021000 |
| C | 2.588695000  | 4.180439000  | -4.074310000 |
| C | 3.208691000  | 5.241127000  | -4.763088000 |
| C | 3.355364000  | 6.472819000  | -4.159163000 |
| H | 3.839586000  | 7.299714000  | -4.675343000 |
| C | 2.864904000  | 6.661205000  | -2.838819000 |
| C | 2.239128000  | 5.639146000  | -2.136678000 |
| H | 1.870173000  | 5.822399000  | -1.127791000 |
| C | -2.554623000 | 0.687372000  | 2.170270000  |
| H | -2.063058000 | 1.656455000  | 2.108428000  |
| C | -3.930154000 | 0.585436000  | 2.148232000  |
| H | -4.559141000 | 1.469608000  | 2.060075000  |
| C | -4.522870000 | -0.684350000 | 2.252114000  |
| C | -3.693262000 | -1.795754000 | 2.367012000  |
| H | -4.136391000 | -2.785547000 | 2.446056000  |

|   |              |              |              |
|---|--------------|--------------|--------------|
| C | -2.304018000 | -1.636052000 | 2.374862000  |
| C | -1.363462000 | -2.749600000 | 2.467607000  |
| C | -1.749665000 | -4.075653000 | 2.669003000  |
| H | -2.796194000 | -4.353626000 | 2.782595000  |
| C | -0.794520000 | -5.083642000 | 2.752755000  |
| C | 0.559984000  | -4.734832000 | 2.613089000  |
| H | 1.341848000  | -5.488800000 | 2.668209000  |
| C | 0.889010000  | -3.405952000 | 2.419160000  |
| H | 1.928322000  | -3.095929000 | 2.323246000  |
| C | 2.376798000  | -0.406271000 | 2.305502000  |
| C | 0.605654000  | 1.644985000  | 2.437847000  |
| C | 0.495456000  | -0.313875000 | 4.291508000  |
| N | 0.089997000  | 0.045627000  | -4.061709000 |
| H | -0.302150000 | -0.703760000 | -4.617774000 |
| H | 0.344220000  | 0.910032000  | -4.525394000 |
| H | 1.073062000  | 3.515549000  | -1.010490000 |
| C | -6.018255000 | -0.767325000 | 2.235038000  |
| O | -6.726080000 | 0.210876000  | 2.087662000  |
| O | -6.454000000 | -2.033286000 | 2.398917000  |
| C | -1.274758000 | -6.481349000 | 3.004056000  |
| O | -2.453867000 | -6.764460000 | 3.110965000  |
| O | -0.246545000 | -7.346813000 | 3.092001000  |
| C | -0.592612000 | -8.742645000 | 3.379355000  |
| H | -1.555231000 | -8.961935000 | 2.902482000  |
| H | 0.204712000  | -9.314468000 | 2.891126000  |
| C | -7.909178000 | -2.209944000 | 2.441303000  |
| H | -8.359807000 | -1.504747000 | 1.732652000  |
| H | -8.056148000 | -3.237351000 | 2.089346000  |

|    |              |               |              |
|----|--------------|---------------|--------------|
| C  | -0.633871000 | -8.992664000  | 4.873125000  |
| H  | 0.321852000  | -8.731668000  | 5.345256000  |
| H  | -1.439215000 | -8.419218000  | 5.348283000  |
| H  | -0.823733000 | -10.059312000 | 5.054752000  |
| C  | -8.441227000 | -2.010607000  | 3.845858000  |
| H  | -7.957836000 | -2.696267000  | 4.553443000  |
| H  | -8.290212000 | -0.977780000  | 4.182571000  |
| H  | -9.520281000 | -2.215923000  | 3.854911000  |
| Cl | 3.050033000  | 8.209464000   | -2.104952000 |
| H  | 3.575812000  | 5.056455000   | -5.772288000 |

**Complex R9**

**Ground state ( $S_0$ )**

|    |              |              |              |
|----|--------------|--------------|--------------|
| Re | 0.316348000  | -1.041172000 | -1.840783000 |
| O  | 7.693581000  | -4.535558000 | -0.534052000 |
| H  | 8.469575000  | -5.120627000 | -0.643381000 |
| O  | 0.302350000  | -3.858823000 | -3.124378000 |
| O  | 0.558292000  | -2.248983000 | 0.995152000  |
| O  | -2.761639000 | -1.200591000 | -1.529982000 |
| N  | 2.554759000  | -0.933867000 | -2.055610000 |
| N  | 5.548388000  | -2.726599000 | -0.779855000 |
| N  | 0.403338000  | 1.061507000  | -1.239104000 |
| N  | 0.058400000  | 0.113282000  | -3.691538000 |
| C  | 3.344461000  | -1.801113000 | -1.368344000 |
| H  | 2.834693000  | -2.547961000 | -0.762724000 |
| C  | 4.731698000  | -1.816808000 | -1.437455000 |
| C  | 5.380424000  | -0.905587000 | -2.330317000 |
| C  | 4.557152000  | -0.003719000 | -3.028383000 |



|   |              |              |              |
|---|--------------|--------------|--------------|
| H | 4.988484000  | 0.727369000  | -3.711950000 |
| C | 3.186536000  | -0.045655000 | -2.859241000 |
| H | 2.556342000  | 0.651932000  | -3.407176000 |
| C | 5.265115000  | -3.129509000 | 0.411424000  |
| C | 6.005719000  | -4.130203000 | 1.158523000  |
| C | 7.160892000  | -4.797138000 | 0.684372000  |
| C | 7.758743000  | -5.749745000 | 1.520797000  |
| C | 7.289746000  | -6.071781000 | 2.779278000  |
| H | 7.788776000  | -6.819901000 | 3.393162000  |
| C | 6.153742000  | -5.396227000 | 3.224706000  |
| C | 5.519349000  | -4.447819000 | 2.447822000  |
| H | 4.632276000  | -3.945498000 | 2.832748000  |
| C | 0.636899000  | 1.477951000  | 0.024941000  |
| H | 0.790001000  | 0.696829000  | 0.767068000  |
| C | 0.673592000  | 2.816388000  | 0.377248000  |
| H | 0.863436000  | 3.122226000  | 1.405169000  |
| C | 0.455450000  | 3.784249000  | -0.606311000 |
| C | 0.216035000  | 3.363853000  | -1.912762000 |
| H | 0.048036000  | 4.105990000  | -2.689262000 |
| C | 0.196508000  | 1.999129000  | -2.208768000 |
| C | -0.044782000 | 1.470409000  | -3.560466000 |
| C | -0.376237000 | 2.274266000  | -4.649573000 |
| H | -0.482548000 | 3.353719000  | -4.557035000 |
| C | -0.601129000 | 1.700575000  | -5.898869000 |
| C | -0.472685000 | 0.315084000  | -6.029517000 |
| H | -0.635558000 | -0.175851000 | -6.986636000 |
| C | -0.143166000 | -0.435131000 | -4.909997000 |
| H | -0.045443000 | -1.517654000 | -4.969677000 |

|   |              |              |               |
|---|--------------|--------------|---------------|
| C | 0.305994000  | -2.812911000 | -2.621078000  |
| C | 0.474095000  | -1.816972000 | -0.081724000  |
| C | -1.610340000 | -1.135332000 | -1.646504000  |
| N | 6.722877000  | -0.943141000 | -2.432928000  |
| H | 7.213844000  | -0.401379000 | -3.131420000  |
| H | 7.202235000  | -1.710438000 | -1.966781000  |
| H | 4.406428000  | -2.704189000 | 0.964273000   |
| F | 5.669504000  | -5.686953000 | 4.452522000   |
| F | 8.864664000  | -6.371922000 | 1.028391000   |
| C | 0.486464000  | 5.231865000  | -0.195570000  |
| O | 0.737031000  | 5.577406000  | 0.941245000   |
| O | 0.206090000  | 6.046213000  | -1.228257000  |
| C | -0.983829000 | 2.619695000  | -7.028569000  |
| O | -1.094946000 | 3.821200000  | -6.878773000  |
| O | -1.171023000 | 1.941218000  | -8.170885000  |
| C | -1.578600000 | 2.729142000  | -9.343136000  |
| H | -1.121849000 | 3.722233000  | -9.261679000  |
| H | -1.140311000 | 2.183360000  | -10.186094000 |
| C | 0.164300000  | 7.484130000  | -0.923904000  |
| H | 0.930088000  | 7.692936000  | -0.167590000  |
| H | 0.437746000  | 7.957193000  | -1.873517000  |
| C | -3.087773000 | 2.804767000  | -9.438804000  |
| H | -3.533438000 | 1.802720000  | -9.474959000  |
| H | -3.511953000 | 3.359220000  | -8.592705000  |
| H | -3.362221000 | 3.333011000  | -10.362018000 |
| C | -1.216544000 | 7.897319000  | -0.458913000  |
| H | -1.978709000 | 7.649163000  | -1.208456000  |
| H | -1.474275000 | 7.417314000  | 0.492934000   |

|   |              |             |              |
|---|--------------|-------------|--------------|
| H | -1.232040000 | 8.984780000 | -0.304640000 |
|---|--------------|-------------|--------------|

**Complex R9**

**Triplet state (T<sub>1</sub>)**

|    |              |              |              |
|----|--------------|--------------|--------------|
| Re | 0.372438000  | -1.064048000 | -1.891929000 |
| O  | 7.477163000  | -4.469927000 | -0.530475000 |
| H  | 8.252296000  | -5.047076000 | -0.690067000 |
| O  | 0.343630000  | -3.889602000 | -3.168212000 |
| O  | 0.606241000  | -2.309923000 | 0.928488000  |
| O  | -2.707035000 | -1.204706000 | -1.599685000 |
| N  | 2.618149000  | -0.983804000 | -2.104761000 |
| N  | 5.635051000  | -2.380320000 | -0.533946000 |
| N  | 0.483281000  | 1.029593000  | -1.273976000 |
| N  | 0.115477000  | 0.106095000  | -3.730886000 |
| C  | 3.401951000  | -1.726340000 | -1.311860000 |
| H  | 2.909325000  | -2.382359000 | -0.597475000 |
| C  | 4.823685000  | -1.705743000 | -1.349855000 |
| C  | 5.445092000  | -0.895895000 | -2.386800000 |
| C  | 4.601636000  | -0.133853000 | -3.212384000 |
| H  | 5.015014000  | 0.501658000  | -3.995083000 |
| C  | 3.233446000  | -0.189359000 | -3.035524000 |
| H  | 2.576933000  | 0.403467000  | -3.667027000 |
| C  | 5.245814000  | -2.945992000 | 0.618442000  |
| C  | 5.908495000  | -4.015697000 | 1.266896000  |
| C  | 7.022331000  | -4.736619000 | 0.714023000  |
| C  | 7.628806000  | -5.739933000 | 1.480680000  |
| C  | 7.195572000  | -6.112951000 | 2.735187000  |
| H  | 7.683585000  | -6.905776000 | 3.298407000  |

|   |              |              |              |
|---|--------------|--------------|--------------|
| C | 6.084099000  | -5.417071000 | 3.245921000  |
| C | 5.451606000  | -4.410095000 | 2.556457000  |
| H | 4.604319000  | -3.899464000 | 3.012017000  |
| C | 0.726889000  | 1.440126000  | -0.005614000 |
| H | 0.895425000  | 0.653416000  | 0.727529000  |
| C | 0.752956000  | 2.770932000  | 0.360731000  |
| H | 0.950527000  | 3.067269000  | 1.389595000  |
| C | 0.507177000  | 3.751963000  | -0.612817000 |
| C | 0.254132000  | 3.341290000  | -1.918201000 |
| H | 0.063389000  | 4.089096000  | -2.684103000 |
| C | 0.246661000  | 1.979874000  | -2.235068000 |
| C | -0.001874000 | 1.467505000  | -3.581174000 |
| C | -0.352970000 | 2.276108000  | -4.662515000 |
| H | -0.469691000 | 3.353294000  | -4.555896000 |
| C | -0.586716000 | 1.715950000  | -5.914664000 |
| C | -0.445491000 | 0.326326000  | -6.062336000 |
| H | -0.616723000 | -0.155880000 | -7.022035000 |
| C | -0.097839000 | -0.429551000 | -4.957240000 |
| H | 0.005716000  | -1.511002000 | -5.029769000 |
| C | 0.351798000  | -2.839744000 | -2.672723000 |
| C | 0.522900000  | -1.861214000 | -0.143042000 |
| C | -1.555871000 | -1.144354000 | -1.709132000 |
| N | 6.777727000  | -0.928447000 | -2.486084000 |
| H | 7.283008000  | -0.391860000 | -3.179938000 |
| H | 7.279600000  | -1.534430000 | -1.838152000 |
| H | 4.397499000  | -2.511749000 | 1.166849000  |
| F | 5.643105000  | -5.760811000 | 4.471297000  |
| F | 8.686799000  | -6.371317000 | 0.904859000  |

|   |              |             |               |
|---|--------------|-------------|---------------|
| C | 0.520016000  | 5.189850000 | -0.188535000  |
| O | 0.776007000  | 5.532757000 | 0.949608000   |
| O | 0.216046000  | 6.015906000 | -1.209882000  |
| C | -0.993305000 | 2.637847000 | -7.025535000  |
| O | -1.106353000 | 3.840300000 | -6.874331000  |
| O | -1.205339000 | 1.964218000 | -8.171431000  |
| C | -1.645794000 | 2.758956000 | -9.323110000  |
| H | -1.185194000 | 3.751168000 | -9.250982000  |
| H | -1.236281000 | 2.218547000 | -10.184078000 |
| C | 0.149460000  | 7.444929000 | -0.883978000  |
| H | 0.916628000  | 7.659379000 | -0.130417000  |
| H | 0.405145000  | 7.939369000 | -1.827887000  |
| C | -3.157533000 | 2.841170000 | -9.373964000  |
| H | -3.607791000 | 1.840810000 | -9.402053000  |
| H | -3.553408000 | 3.391145000 | -8.511387000  |
| H | -3.458534000 | 3.376366000 | -10.284868000 |
| C | -1.235307000 | 7.825418000 | -0.401192000  |
| H | -1.998915000 | 7.570668000 | -1.147133000  |
| H | -1.474252000 | 7.326800000 | 0.546034000   |
| H | -1.272367000 | 8.910234000 | -0.232080000  |

### Complex R10

#### Ground state ( $S_0$ )

|    |             |              |              |
|----|-------------|--------------|--------------|
| Re | 0.102195000 | 0.304870000  | -0.069822000 |
| O  | 7.201350000 | 2.760211000  | -2.906680000 |
| H  | 6.573441000 | 2.253381000  | -2.301949000 |
| O  | 0.136648000 | 0.621766000  | -3.146356000 |
| O  | 0.050244000 | -2.778425000 | -0.350601000 |

|   |              |              |              |
|---|--------------|--------------|--------------|
| O | -2.992628000 | 0.335114000  | -0.188053000 |
| N | 2.350727000  | 0.261529000  | 0.014000000  |
| N | 5.218953000  | 1.261320000  | -2.108441000 |
| N | 0.062653000  | 0.391520000  | 2.117959000  |
| N | 0.248487000  | 2.429172000  | 0.436273000  |
| C | 3.092475000  | 0.787042000  | -0.991306000 |
| H | 2.554286000  | 1.335629000  | -1.762552000 |
| C | 4.475865000  | 0.687765000  | -1.080403000 |
| C | 5.180148000  | 0.024032000  | -0.029175000 |
| C | 4.401649000  | -0.510876000 | 1.014314000  |
| H | 4.875204000  | -1.044022000 | 1.838624000  |
| C | 3.027640000  | -0.384291000 | 0.993537000  |
| H | 2.430980000  | -0.819089000 | 1.793023000  |
| C | 4.795861000  | 1.252154000  | -3.344131000 |
| C | 5.495522000  | 1.922098000  | -4.401423000 |
| C | 6.691145000  | 2.659146000  | -4.145820000 |
| C | 7.354860000  | 3.293090000  | -5.206287000 |
| C | 6.851238000  | 3.208639000  | -6.495160000 |
| H | 7.356372000  | 3.696102000  | -7.328933000 |
| C | 5.675804000  | 2.487149000  | -6.736414000 |
| C | 4.997859000  | 1.846989000  | -5.723988000 |
| H | 4.087476000  | 1.288181000  | -5.943122000 |
| C | -0.106151000 | -0.689206000 | 2.914077000  |
| H | -0.169068000 | -1.651621000 | 2.408923000  |
| C | -0.211584000 | -0.596736000 | 4.290906000  |
| H | -0.356836000 | -1.484082000 | 4.905637000  |
| C | -0.140746000 | 0.661895000  | 4.893978000  |
| C | 0.035190000  | 1.780577000  | 4.082013000  |

|   |              |              |              |
|---|--------------|--------------|--------------|
| H | 0.080500000  | 2.766950000  | 4.537028000  |
| C | 0.131660000  | 1.625543000  | 2.696421000  |
| C | 0.260239000  | 2.755606000  | 1.762700000  |
| C | 0.350039000  | 4.085036000  | 2.173467000  |
| H | 0.359628000  | 4.362395000  | 3.226122000  |
| C | 0.419642000  | 5.106455000  | 1.228775000  |
| C | 0.402320000  | 4.763933000  | -0.125589000 |
| H | 0.446742000  | 5.528342000  | -0.898452000 |
| C | 0.318229000  | 3.424212000  | -0.474270000 |
| H | 0.288132000  | 3.120006000  | -1.519136000 |
| C | 0.126740000  | 0.477628000  | -1.991935000 |
| C | 0.065070000  | -1.621291000 | -0.268711000 |
| C | -1.835263000 | 0.330027000  | -0.140890000 |
| N | 6.522985000  | -0.082281000 | -0.073608000 |
| H | 7.038754000  | -0.562792000 | 0.651272000  |
| H | 7.030686000  | 0.283120000  | -0.870354000 |
| H | 3.879842000  | 0.703540000  | -3.619442000 |
| H | 8.268003000  | 3.848252000  | -4.994503000 |
| F | 5.202528000  | 2.422561000  | -8.003660000 |
| C | -0.281315000 | 0.732977000  | 6.391502000  |
| O | -0.436006000 | -0.259534000 | 7.073812000  |
| O | -0.224520000 | 1.999644000  | 6.837746000  |
| C | 0.492175000  | 6.524417000  | 1.731482000  |
| O | 0.498612000  | 6.794404000  | 2.916616000  |
| O | 0.548026000  | 7.401304000  | 0.716592000  |
| C | 0.594097000  | 8.824285000  | 1.082141000  |
| H | 1.149275000  | 8.915381000  | 2.023009000  |
| H | 1.163793000  | 9.281885000  | 0.265739000  |

|   |              |              |              |
|---|--------------|--------------|--------------|
| C | -0.369730000 | 2.176306000  | 8.290489000  |
| H | -0.777842000 | 3.188534000  | 8.385049000  |
| H | -1.102766000 | 1.443268000  | 8.647931000  |
| C | 0.961515000  | 2.030596000  | 8.997026000  |
| H | 1.352044000  | 1.010528000  | 8.900112000  |
| H | 1.699181000  | 2.742316000  | 8.604956000  |
| H | 0.822177000  | 2.239574000  | 10.066435000 |
| C | -0.803119000 | 9.397456000  | 1.191252000  |
| H | -1.361758000 | 9.261556000  | 0.256605000  |
| H | -1.359187000 | 8.934466000  | 2.015671000  |
| H | -0.733316000 | 10.475053000 | 1.392508000  |

### Complex R10

#### Triplet state ( $T_1$ )

|    |              |              |              |
|----|--------------|--------------|--------------|
| Re | 0.408879000  | 1.580868000  | -0.513618000 |
| O  | 7.704487000  | 1.059224000  | -3.746559000 |
| H  | 6.967670000  | 1.145946000  | -3.018799000 |
| O  | 0.437689000  | 2.572989000  | -3.449866000 |
| O  | 0.711632000  | -1.333299000 | -1.512283000 |
| O  | -2.671639000 | 1.282114000  | -0.684116000 |
| N  | 2.641715000  | 1.753427000  | -0.386242000 |
| N  | 5.617456000  | 0.715117000  | -2.308645000 |
| N  | 0.419999000  | 1.163756000  | 1.629521000  |
| N  | 0.194093000  | 3.530964000  | 0.455824000  |
| C  | 3.418210000  | 1.226141000  | -1.350558000 |
| H  | 2.899424000  | 0.794134000  | -2.203282000 |
| C  | 4.827952000  | 1.237361000  | -1.332811000 |
| C  | 5.468540000  | 1.887508000  | -0.213300000 |



|   |              |              |              |
|---|--------------|--------------|--------------|
| C | 4.640150000  | 2.456814000  | 0.769848000  |
| H | 5.075546000  | 2.960504000  | 1.632700000  |
| C | 3.268044000  | 2.355475000  | 0.663977000  |
| H | 2.628912000  | 2.773542000  | 1.437423000  |
| C | 5.174747000  | -0.167648000 | -3.221573000 |
| C | 5.981585000  | -0.527334000 | -4.330442000 |
| C | 7.277920000  | 0.102585000  | -4.561416000 |
| C | 8.087904000  | -0.279899000 | -5.650201000 |
| C | 7.651745000  | -1.244044000 | -6.535844000 |
| H | 8.246906000  | -1.556705000 | -7.392190000 |
| C | 6.387229000  | -1.837384000 | -6.314962000 |
| C | 5.564637000  | -1.508147000 | -5.253101000 |
| H | 4.606421000  | -2.014149000 | -5.138024000 |
| C | 0.569547000  | -0.070648000 | 2.170041000  |
| H | 0.741069000  | -0.882522000 | 1.465625000  |
| C | 0.506120000  | -0.308680000 | 3.527505000  |
| H | 0.628568000  | -1.313307000 | 3.928598000  |
| C | 0.274441000  | 0.768750000  | 4.400027000  |
| C | 0.113507000  | 2.039099000  | 3.856182000  |
| H | -0.068880000 | 2.882106000  | 4.518204000  |
| C | 0.184521000  | 2.224369000  | 2.471311000  |
| C | 0.033352000  | 3.524333000  | 1.821306000  |
| C | -0.271805000 | 4.702430000  | 2.506534000  |
| H | -0.427250000 | 4.712030000  | 3.583967000  |
| C | -0.408549000 | 5.902407000  | 1.817759000  |
| C | -0.210003000 | 5.903493000  | 0.426927000  |
| H | -0.299292000 | 6.819606000  | -0.152253000 |
| C | 0.084509000  | 4.707956000  | -0.203311000 |

|   |              |              |              |
|---|--------------|--------------|--------------|
| H | 0.225967000  | 4.665576000  | -1.281937000 |
| C | 0.427520000  | 2.187970000  | -2.353247000 |
| C | 0.588750000  | -0.235098000 | -1.149819000 |
| C | -1.522134000 | 1.398070000  | -0.613843000 |
| N | 6.809714000  | 1.913668000  | -0.132527000 |
| H | 7.282399000  | 2.352502000  | 0.647757000  |
| H | 7.366716000  | 1.416375000  | -0.817834000 |
| H | 4.204055000  | -0.663962000 | -3.110041000 |
| H | 9.050139000  | 0.215231000  | -5.775360000 |
| F | 5.977080000  | -2.772881000 | -7.184328000 |
| C | 0.210771000  | 0.487390000  | 5.870540000  |
| O | 0.350418000  | -0.629748000 | 6.330203000  |
| O | -0.017898000 | 1.607858000  | 6.586098000  |
| C | -0.782455000 | 7.121575000  | 2.608147000  |
| O | -0.939868000 | 7.101978000  | 3.814725000  |
| O | -0.916574000 | 8.200461000  | 1.814069000  |
| C | -1.326852000 | 9.445716000  | 2.471226000  |
| H | -0.907213000 | 9.453073000  | 3.483982000  |
| H | -0.855179000 | 10.228118000 | 1.865737000  |
| C | -0.095367000 | 1.438248000  | 8.040424000  |
| H | -0.754638000 | 2.252412000  | 8.361857000  |
| H | -0.569719000 | 0.471378000  | 8.246770000  |
| C | 1.276623000  | 1.536311000  | 8.675464000  |
| H | 1.921875000  | 0.711264000  | 8.350285000  |
| H | 1.758463000  | 2.491980000  | 8.431809000  |
| H | 1.172772000  | 1.476054000  | 9.767464000  |
| C | -2.835971000 | 9.573569000  | 2.484548000  |
| H | -3.246401000 | 9.525065000  | 1.467919000  |

|   |              |              |             |
|---|--------------|--------------|-------------|
| H | -3.293998000 | 8.786706000  | 3.096433000 |
| H | -3.111629000 | 10.544542000 | 2.918152000 |
